# High power transient 15-29Hz beta event features as early biomarkers of Alzheimer's Disease conversion: a MEG study

Danylyna Shpakivska-Bilan <sup>1,5\*</sup>, Gianluca Susi <sup>2,5</sup>, David W Zhou <sup>6,7</sup>, Jesus Cabrera <sup>1,5</sup>,  
Blanca P Carvajal <sup>1,5</sup>, Ernesto Pereda <sup>3</sup>, Maria Eugenia Lopez <sup>1,5</sup>, Ricardo Bruña <sup>4,5</sup>,  
Fernando Maestu <sup>1,5</sup>, Stephanie R Jones <sup>6,7</sup>

<sup>1</sup>Department of Experimental Psychology,

School of Psychology, Complutense University of Madrid, Spain,

<sup>2</sup>Department of Structure of Matter, Thermal Physics and Electronics,

School of Physics, Complutense University of Madrid, Spain

<sup>3</sup>Department of Industrial Engineering and Institute of Biomedical Technology,

Universidad de La Laguna, La Laguna, Tenerife, Spain

<sup>4</sup>Department of Radiology, Universidad Complutense de Madrid, Madrid, Spain

<sup>5</sup>Center for Cognitive and Computational Neuroscience,

Complutense University of Madrid, Spain

<sup>6</sup>Carney Institute for Brain Sciences, Brown University, Providence, RI United States

<sup>7</sup>Department of Neuroscience, Brown University, Providence, RI, United States

\*Correspondence: [danyshpa@ucm.es](mailto:danyshpa@ucm.es)

September 13, 2024

## Abstract:

A typical pattern observed in M/EEG recordings of Mild Cognitive Impairment (MCI) patients progressing to Alzheimer's disease is a continuous slowing of brain oscillatory activity. Definitions of oscillatory slowing are imprecise, as they average across time and frequency bands, masking the finer structure in the signal and potential reliable biomarkers of the disease.

Recent studies show that high averaged band power can result from transient increases in power, termed 'events' or 'bursts'. To better understand MEG oscillatory slowing in AD progression, we analyzed features of high-power oscillatory events and their relationship to cognitive decline. MEG resting-state oscillations were registered in age-matched patients with MCI who later convert (CONV, N=41) or do not convert (NOCONV, N=44) to AD, in a period of 2.5 years. To distinguish future CONV from NOCONV, we characterised the rate, duration, frequency span and power of transient high-power events in the alpha and beta band in anterior cingulate (ACC) and precuneus (PC).

Results revealed event-like patterns in resting-state power in both the alpha and beta-bands, however only beta-band features were predictive of conversion to AD, particularly in PC. Specifically, compared to NOCONV, CONV had a lower number of beta events, along with lower power events and a trend toward shorter duration events in PC ( $p < 0.05$ ). Beta event durations were also significantly shorter in ACC ( $p < 0.01$ ). Further, this reduced expression of beta events in CONV predicted lower values of mean relative beta power, increased probability of AD conversion, and poorer cognitive performance.

Our work paves the way for reinterpreting M/EEG slowing and examining beta event features as a new biomarker along the AD continuum, and a potential link to theories of inhibitory cognitive control in neurodegeneration. These results may bring us closer to understanding the neural mechanisms of the disease that help guide new therapies.

**Keywords:** transient high-power events, magnetoencephalography, Alzheimer's Disease, computational neuroscience, mild cognitive impairment

## 1 Introduction

1 According to the World Health Organization 2017 Alzheimer's disease (AD), a leading cause of disability  
2 and dependency among older individuals worldwide, is expected to affect 130 million people by 2050.  
3 Despite intensive research efforts, disease-modifying human therapies are still lacking, since the link  
4 between amyloid-induced cellular damage and cognitive decline is incomplete (Maestú et al., 2021).  
5 Magnetoencephalography (MEG) has been an valuable technique to fill this gap, as it can directly capture  
6

7 human neuronal processes, associated with the disease and cognition, with high temporal resolution (da  
8 Silva, 2013; Maestú et al., 2021).

9 A typical pattern observed in M/EEG recordings of AD patients is a progressive slowing of brain oscillatory  
10 activity (Dauwels et al., 2011; Hsiao et al., 2013; Ishii et al., 2017; Jeong, 2004), typically characterised  
11 by an increase in low-frequency delta (0.5 – 4 Hz) and theta rhythms (4– 7 Hz), along with a decrease in  
12 higher frequency bands, alpha (8–12 Hz) and beta (12–30 Hz) rhythms. This oscillatory slowing initiates  
13 in early stages of the disease, such as Mild Cognitive Impairment (MCI) (Babiloni et al., 2004, 2009,  
14 2010; Dauwels et al., 2011; Jelic et al., 2000), and may even manifest before, in the subjective cognitive  
15 decline stage (Bruña et al., 2023; López-Sanz et al., 2016), progressing from anterior to posterior cortices  
16 and particularly in frontal and parietal regions, (Huang et al., 2000; Nakamura et al., 2018), in line with  
17 the onset of amyloid accumulation in the fronto-temporal association cortices (Bang et al., 2015; Cho  
18 et al., 2016; Wiesman et al., 2022). It has been shown that MCI patients who finally convert to AD  
19 exhibit a significant disruption (i.e., decrease in synchronisation (König et al., 2005; López-Sanz et al.,  
20 2017; Pusil, Dimitriadis, et al., 2019), as stated in the “X” model) between anterior cingulate cortex  
21 (ACC) and precuneus (PC), two regions typically associated with high amyloid deposition (Forsberg  
22 et al., 2008). As MEG oscillatory slowing accelerates, cognitive decline worsens producing alterations in  
23 memory processes and executive functions (Hoshi et al., 2022; Wiesman et al., 2022).

24 Definitions of oscillatory slowing are imprecise, as they typically rely on methods based on a spectral  
25 decomposition followed by averaging across time, frequency bands, and often subjects. Such averaging  
26 can mask finer structure in the signal that may provide more reliable biomarkers of the disease and  
27 cognitive decline and help connect human biomarkers to the underlying neural mechanisms of the disease  
28 including possible connections to hyperexcitability as shown in animal models (Maestú et al., 2021;  
29 Stoiljkovic et al., 2018; Zott et al., 2019). In recent years, there has been a shift in spectral M/EEG  
30 methods, as many studies have shown that, in non-averaged data, brain oscillations often occur as  
31 transient increases in high spectral power, a phenomenon termed oscillatory “bursts” or “events” (Jones,  
32 2016; Lundqvist et al., 2024; van Ede et al., 2018). Quantifying transient changes in spectral activity  
33 requires new methods that consider temporal characteristics of spectral activity such as event rate,  
34 amplitude, duration, or frequency span (Shin et al., 2017). Such event-based methods have recently been  
35 applied in a growing body of M/EEG studies on the brain dynamics of cognitive processes (Kavanaugh  
36 et al., 2023, 2024; McKeon et al., 2023; Morris et al., 2023; Quinn et al., 2019; Shin et al., 2017), helping  
37 to establish neural correlates of cognitive behavior on a single trial level. Variability in oscillatory event  
38 parameters may represent a new set of explainable MEG biomarkers for AD, as it can reflect differences  
39 in circuit-level origins and provide insights into the underlying activity patterns and functions (Jones,  
40 2016; Lundqvist et al., 2024; M. A. Sherman et al., 2016).

41 In this study we applied standard power spectral density (PSD) and event-based analysis methods to  
42 resting-state MEG from adults with MCI who later convert (CONV) or do not convert (NOCONV) to AD.  
43 Motivated by the findings of the AD continuum model described by (Pusil, López, et al., 2019) (namely  
44 the “X” model), we first hypothesized that averaged PSD slowing exhibits divergent effects in features  
45 of high-power transient spectral events. Second, we hypothesized that slowing-related effects in spectral  
46 event features would be associated to cognitive decline, as measured by a battery of neuropsychological  
47 tests in memory and executive functions in the MCI sample. We characterize MEG oscillatory slowing in  
48 terms of transient spectral event parameters in a MCI-to-AD longitudinal sample, taking the initial step  
49 towards the potential identification of biophysically principled biomarkers.

## 50 2 Methods

### 51 2.1 Subject recruitment and neuropsychological assessment

52 Participants were recruited from Hospital Clínico Universitario San Carlos in Madrid, Spain. The study  
53 was approved by the Ethics Committee, and all participants provided written informed consent prior to  
54 participation. All participants were right-handed native Spanish speakers.

55 The study sample included 85 subjects diagnosed with mild cognitive impairment (MCI). Initially, partic-  
56 ipants were screened according to the diagnostic criteria of the National Institute on Aging-Alzheimer’s  
57 Association (NIA-AA) (Albert et al., 2013) and underwent a comprehensive neuropsychological assess-  
58 ment as previously described (López-Sanz et al., 2016; Pusil, Dimitriadis, et al., 2019), along with a  
59 MEG recording. They were cognitively and clinically followed-up in a temporal interval of 2.5 years and  
60 then subdivided in two groups considering the criteria for probable Alzheimer’s disease (McKhann et al.,  
61 2011): 41 subjects with mild cognitive impairment who converted to AD (CONV), and 44 subjects with  
62 mild cognitive impairment (MCI) which did not convert to AD (NOCONV). Subjects in CONV and  
63 NOCONV group were matched by age, sex, and education years, as it is reported in reported in Table 1.

64 The neuropsychological assessment included seven tests: four measures of memory recall, *Immediate*  
65 *Logic Memory Units*, *Delayed Logic Memory Units*, *Immediate Logic Memory Themes* and *Delayed*  
66 *Logic Memory Themes* (Wechsler Memory Scale, WMS-III) (Wechsler, 1955); one measure of working  
67 memory, *Inverse Digits* (WMS-III); one measure of cognitive flexibility, *Trail Making Test-B* (TMT-B)  
68 (Bowie & Harvey, 2006); two language measures, *Semantic Fluency* (Controlled oral Word Association  
69 Test, COWAT) (Benton et al., 1994) and *Boston Naming Test* (BNT) (Kaplan et al., 1983) ; and  
70 one global screening measure for cognitive impairment and dementia, the *Clock-Drawing test* (Agrell &

## 2.2 Magnetoencephalography data acquisition

5

| Descriptives                  | NO CONV Mean $\pm$ SD | CONV Mean $\pm$ SD    | p value          |
|-------------------------------|-----------------------|-----------------------|------------------|
| Age                           | 75.25 $\pm$ 5.36      | 75.39 $\pm$ 4.99      | t (83), p = n.s. |
| Sex                           | N= 44; 19 (m), 25 (f) | N= 41; 17 (m), 24 (f) | Xi (1), p = n.s. |
| Education years               | 9.89 $\pm$ 5.39       | 8.32 $\pm$ 4.30       | t (71), p = n.s. |
| Immediate Logic Memory Units  | 17.30 $\pm$ 12.61     | 10.89 $\pm$ 7.41      | t (83), p = .01  |
| Delayed Logic Memory Units    | 7.64 $\pm$ 9.10       | 2.20 $\pm$ 4.08       | t (83), p < .01  |
| Immediate Logic Memory Themes | 10.60 $\pm$ 5.03      | 7.70 $\pm$ 3.83       | t (83), p < .01  |
| Delayed Logic Memory Themes   | 4.86 $\pm$ 4.52       | 2.29 $\pm$ 2.47       | t (83), p < .01  |
| Inverse Digits                | 4.16 $\pm$ 1.79       | 4.15 $\pm$ 1.28       | t (83), p = n.s. |
| Semantic Fluency              | 11.86 $\pm$ 3.56      | 11.15 $\pm$ 3.60      | t (83), p = n.s. |
| Trail Making Test - B         | 211.15 $\pm$ 112.72   | 251.34 $\pm$ 108.15   | t (83), p = n.s. |
| Boston Naming Test            | 46.45 $\pm$ 9.77      | 43.80 $\pm$ 8.74      | t (83), p = n.s. |
| Clock-Drawing Test            | 5.43 $\pm$ 2.08       | 5.07 $\pm$ 2.26       | t (83), p = n.s. |

Table 1: Mean  $\pm$  SD values of the demographic and neuropsychological characteristics for AD converters (CONV) and NOCONV groups

71 Dehlin, 1998). Table 1 includes paired t-test and previously reported differences across groups (López-  
72 Sanz et al., 2016; Pusil, Dimitriadis, et al., 2019) .

## 73 2.2 Magnetoencephalography data acquisition

74 The dataset was acquired using a 306-channel (102 magnetometers and 204 gradiometers) Vectorview  
75 MEG system (Elekta AB, Stockholm, Sweden) placed inside a magnetically shielded room (Vacuum-  
76 Schmelze GmbH, Hanau, Germany) located at the Laboratory of Cognitive and Computational Neu-  
77 roscience (Madrid, Spain). MEG data consisted of 5 min eyes-closed resting-state recordings in a 60  
78 min session, with a sampling rate of 1000 Hz and an online [0.1 - 330] Hz anti-alias band-pass filter.  
79 To allow further analysis, including subject-specific source reconstruction, MEG recordings were com-  
80 plemented by MRI scans acquired within a month after the MEG session, which were recorded at the  
81 Hospital Universitario Clínico San Carlos (Madrid, Spain) using a 1.5 T General Electric MRI scanner  
82 with a high-resolution antenna and a homogenization PURE filter (fast spoiled gradient echo sequence,  
83 with parameters: repetition time/echo time/inversion time = 11.2/4.2/450 ms; flip angle = 12°; slice  
84 thickness = 1 mm; 256 $\times$ 256 matrix; field of view = 256 mm).

85 The MEG recordings were preprocessed offline using a temporal-spatial filtering algorithm (tSSS) (Taulu  
86 & Hari, 2009) (Maxfilter Software v2.2, correlation limit of 0.9 and correlation window of 10 s) to

87 eliminate magnetic noises and compensate for head movements during the recording. The continuous  
88 MEG data were imported into MATLAB (R2017b, Mathworks, Inc.) for pre-processing steps, carried  
89 out using the Fieldtrip Toolbox (Oostenveld et al., 2011) (<https://www.fieldtriptoolbox.org/>). Data  
90 were automatically scanned for ocular, muscle and jump artefacts using the Fieldtrip software. Artefacts  
91 were then visually confirmed by an MEG expert. The remaining artefact-free data were segmented  
92 into 4-s segments (epochs). An independent component analysis-based procedure was used to remove  
93 the heart magnetic field artefact. Source reconstruction was performed using minimum norm estimates  
94 (Hämäläinen & Ilmoniemi, 1994) with the software Brainstorm (Tadel et al., 2011). Current dipoles  
95 were constrained to be perpendicular to the individual's cortical surface, to model the orientation of  
96 macro columns of pyramidal neurons (Tadel et al., 2011). Neural time series were finally averaged  
97 within regions of interest (ROI) of the Schaefer 100-17 network atlas (Schaefer et al., 2018). Two  
98 regions of interest were extracted for subsequent analysis: the anterior cingulate cortex (as the merge  
99 of *left ACC* and *right ACC*, corresponding to *SalVentAttnB PFCmp1* area of the mentioned atlas,  
100 respectively), and the precuneus (as the merge of *left PC* and *right PC*, corresponding to *ContC pCun 1*  
101 and *DefaultApCunPCC 1* area of the mentioned atlas), see Figure 1a. The data was band-pass filtered  
102 between 0.5 and 45 Hz (broadband), using FIR filtering.

### 103 2.3 Power spectral density (PSD)

104 We computed the power spectral density of each of the ROI time series by using the Welch's periodogram  
105 method (Welch, 1967), with 1s window length and 50% overlap ratio. For each ROI signal, the normalised  
106 power was calculated by averaging the power spectral density obtained by each epoch and then normalising  
107 the value associated to each frequency by total power over the [1–30] Hz range (Figure 2).

### 108 2.4 Time-Frequency Representations (TFRs) & Spectral Events Extraction

109 During resting-state alpha and beta activity, periods of transient high power can be quantified over time  
110 in unaveraged data. We use a time-frequency-based algorithm as in Shin et al. (2017) to capture these  
111 bursts.

112 Time-Frequency Representations (TFRs) were calculated using the MATLAB SpectralEvents Toolbox  
113 (find method = 1, as in Shin et al. (2017)) (<https://github.com/jonescompneurolab/SpectralEvents>).  
114 Each artefact-free 4-sec epoch was convolved with a 7-cycle Morlet wavelet. For all epochs, TFR across  
115 time and across each patient was calculated and finally averaged to obtain a representative TFR for each

## 2.4 Time-Frequency Representations (TFRs) & Spectral Events Extraction

7

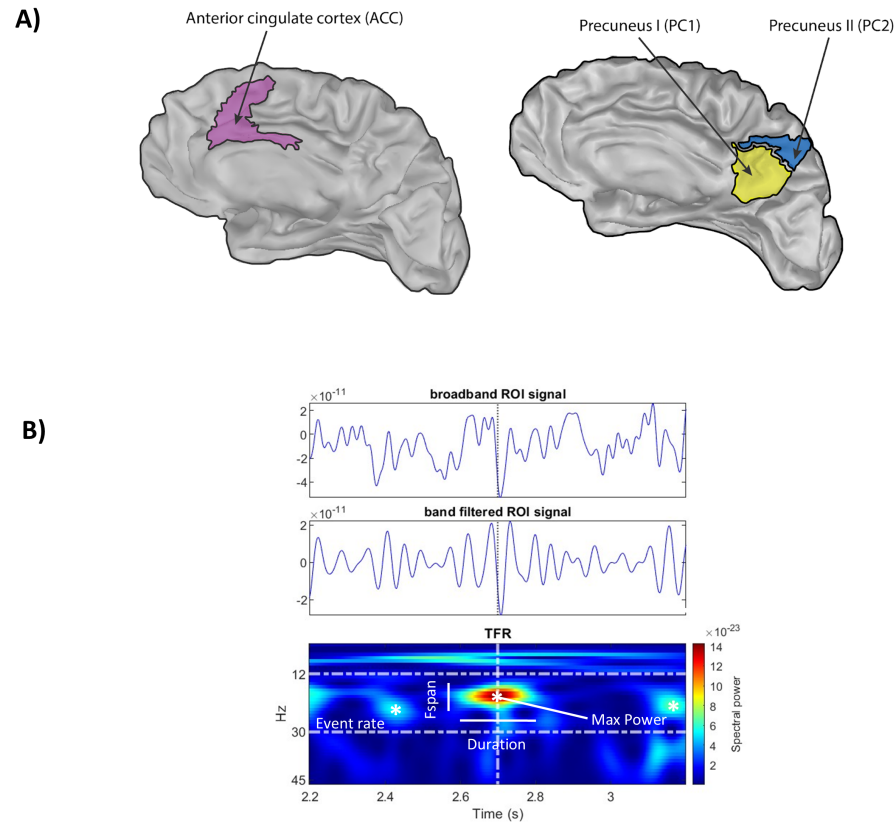

Figure 1: a) Representation of the right side regions of interest using the Schaefer 100-17 network atlas: *SalVentAttnBPFCmp1* (corresponding to ACC), *ContCpCun1* (corresponding to PC) and *DefaultApCunPCC1* (corresponding to PC); b) Example of resting-state beta activity from left-ACC and detection of transient burst of high-power activity (events), using the frequency-based algorithm of Shin et al. (2017). There are several possible features of such events that could contribute to increased power averaged across time and frequency, including event number (rate), event duration, event frequency span and event power

116 ROI (PC or ACC) and group (CONV or NOCONV) in the range [2-30] Hz.

117 The bands of interest reflected the slowing effect typical of MCI (Bruña et al., 2023; Dauwels et al.,  
118 2011; López-Sanz et al., 2016) and observed in our sample and were chosen to be [5-10] Hz for alpha  
119 and [12-30Hz] for beta. (See also methods section 2.5 *Statistical Analysis*). More specifically, we defined  
120 alpha by determining the group averaged peak (GAP) frequency of 8Hz in PC and taking a range of GAP  
121 [-3, +2] Hz. This choice provides a more precise capture of alpha oscillations in the ageing population  
122 (Tröndle et al., 2023) and reflects the range of significant difference in both PC and ACC across groups  
123 in our sample (see results Figure 2 below). The [12-30]Hz beta band, which does not exhibit a clear  
124 GAP, was similarly chosen to include the areas of significant difference in our sample.

125 Spectral Events were detected by first retrieving all local maxima in un-normalized TFR using *imregional-*  
126 *max*. For each subject and ROI, transient high-power events were defined as local maxima above a 6X  
127 factor of the median (FOM) threshold within a frequency band of interest, to be consistent with prior  
128 studies (Shin et al., 2017). Additionally, we tested the robustness of our analysis with 4X FOM and 8X  
129 FOM thresholds (see Supplementary Figure 2 and Supplementary Table 1 & 2). As reported, we had  
130 the most significant results for 6X FOM median threshold. The spectral event method applied (namely,  
131 find method=1 in the SpectralEvent Toolbox) allows for multiple, overlapping events to occur in a given  
132 suprathreshold region and does not guarantee the presence of within-band, suprathreshold activity in any  
133 given trial, see Figure 1b.

134 Importantly, it was noticed that events detected in contralateral medial ROIs (especially in left ACC and  
135 right ACC) were in part mirrored across the midline due to the close proximity of neighbouring bilateral  
136 dipoles (this effect of spatial smearing in source reconstruction is explained in Supplementary Figure 1).  
137 To remove duplicated mirror events when two detected events shared the corresponding contralateral  
138 ROI, epoch, time and frequency, we rejected the one with lower amplitude.

139 For each subject and ROI, spectral events were characterised by 4 key features: event number in a fixed  
140 time window (i.e. event rate), duration, frequency span (Fspan) and power (Power FOM) (see Figure  
141 1b). Event number was calculated by counting the number of events in the 4-second period of each  
142 epoch. Event power was calculated as the normalised FOM power value at each event maximum. Event  
143 duration and frequency span were calculated from the boundaries of the region containing power values  
144 greater than half the local maxima power, as the full-width-at-half-maximum in the time and frequency  
145 domain, respectively.

## 146 2.5 Statistical analysis

147 To determine frequency ranges that represent oscillatory slowing in our cohort, we tested for significant  
148 differences in average power spectral density between AD CONV and NOCONV for each selected ROI  
149 by performing a non-parametric statistical test (Maris & Oostenveld, 2007) in the frequency domain (see  
150 light grey window in Figure 2).

151 In each frequency-band, we examined the relationship between event features and the averaged PSD using  
152 a linear regression analysis over all subjects. The regression  $\beta$  coefficients were calculated with a 95%  
153 CI and all p-values were corrected for multiple comparisons using the Benjamini–Hochberg (BH) step-up  
154 procedure (Benjamini & Hochberg, 1995) with a False Discovery Rate (Q) set at 0.05. Statistically  
155 significant p-values after BH correction are reported as  $*p < 0.05(Q = 0.05)$ .



## 2.5 Statistical analysis

9

156 We also tested for group differences in spectral event features between CONV and NOCONV groups.  
157 High power spectral event features were detected in alpha and beta frequency bands for each resting  
158 state segment from four ROI's (left and right ACC and PC, respectively). Event rates were averaged  
159 across epochs, and other features (duration, f-span, power) were averaged across all events, and then  
160 between hemispheres, within each subject. The final dataset consisted of 16 variables for each subject:  
161 four event features (averaged spectral event rate, duration, f-span and power); by two ROI's (ACC,  
162 PC); by two frequency bands (alpha and beta). For each variable, t-tests were used to assess group  
163 differences in transient event features. The tests were conducted with a left tail for the beta band and a  
164 right tail for the alpha band. This approach was consistent with the observation that the average power  
165 spectra in the alpha band are higher for CONV compared to NOCONV, while the effect is reversed in the  
166 beta band. We hypothesized that differences in event features align with the directional trend observed  
167 in the averaged relative spectral power. All reported p-values were corrected for multiple comparisons  
168 across the number of tests applied using the Benjamini–Hochberg (BH) step-up procedure (Benjamini  
169 & Hochberg, 1995) with a False Discovery Rate (Q) set at 0.05. Statistically significant p-values after  
170 BH correction are reported as  $* * p < 0.05(Q = 0.05)$ . Statistical tendencies are reported as significant  
171 if  $*p < 0.1$ . We computed effect size of the differences between groups with a robust variant of Cohen's  
172 d (Algina et al., 2005).

173 For event features where significant difference across groups were found, we examined the relationship  
174 between these features and AD conversion and cognitive performance.

175 To assess the relationship with AD conversion, we fit beta event features from ACC and PC to a  
176 logistic regression model ( `R glm()` function, `family = binomial` argument) in order to predict each  
177 patient's conversion label (CONV or NOCONV). The model's output is the probability of the positive  
178 class (CONV group). We used a default 0.5 threshold value to transform the probability to a binary  
179 class. Thus, a subject is classified as class 1 (CONV) if the predicted probability is greater than or equal  
180 to 0.5, and class 0 if the probability is less than 0.5. The odds ratio in logistic regression is calculated  
181 by exponentiating the coefficient of the predictor variable. As an example, for predictor variable *Number*  
182 *of events*, if the coefficient is  $\beta = 0.58$  the odds ratio is given by  $OR = e^{0.58} \approx 1.79$ . This means that  
183 the likelihood of the predicted outcome (AD conversion), is approximately 1.79 times greater than the  
184 likelihood of the outcome not occurring (no conversion to AD). Every reduction of 1 unit in *Number of*  
185 *events* increases by 79% the odds of AD conversion (CONV group).

186 To assess the relationship with cognitive performance, we calculated a Cognitive Performance Index and  
187 applied linear regression. Aiming to account for variability across the nine neuropsychological tests used,  
188 the Cognitive Performance Index was calculated by applying Principal Components Analysis (PCA) (R

189 *princomp()* function) to the neuropsychological testing dataset. As a first step, the data from each  
190 of the nine tests was z-scored to prevent biases due to different test scales. Additionally, the data  
191 were transformed so that for each test higher values correspond to better cognitive performance. Then,  
192 we extracted the first principal component, which explained at least 55% of variance. The projection of  
193 individual data onto the new axes (principal component) represent the Cognitive Performance Index values  
194 for each subject, and this projection is achieved through linear transformation using the eigenvectors of  
195 the covariance matrix. All eigenvectors had a positive load in the first component. A subject with higher  
196 values of this Cognitive Performance Index correspond to better cognitive performance.

### 197 3 Results

#### 198 3.1 AD Converters (CONV) exhibit oscillatory slowing in average PSD

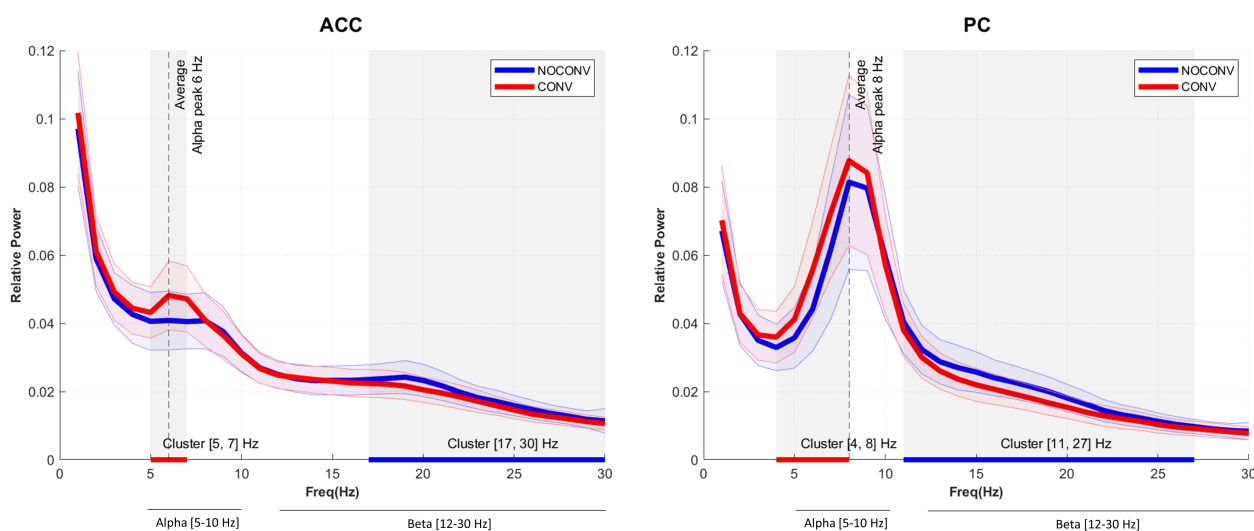

Figure 2: Normalized power spectral density plots (mean  $\pm$  SEM) for regions of interest in CONV and NOCONV patients, in the range [2-30] Hz. Shaded grey areas represent statistically significant clusters of differences between CONV and NOCONV groups (non-parametric statistical test).

199 We confirm a slowing effect in power spectral density in CONV subjects for all ROIs of interest in ACC  
200 and PC, as observed in prior studies (Pusil, Dimitriadis, et al., 2019). In averaged PSD, the CONV group  
201 shows a statistically significant cluster of decreased relative power in beta frequency band compared to

### 3.2 Resting-state alpha and beta emerge as transient high-power events

11

202 NOCONV (Figure 2, 17-30Hz ACC and 11-27Hz PC, blue underlines) and increased relative power in  
203 lower frequency bands (theta, low-alpha) (Figure 2, 5-7Hz ACC and 4-8Hz PC, red underlines). Based  
204 on our data, for all subsequent analyses, we utilized a [5-10] Hz alpha bands and [12-30] Hz beta-band  
205 (see Methods section 2.4 for further details).

### 3.2 Resting-state alpha and beta emerge as transient high-power events

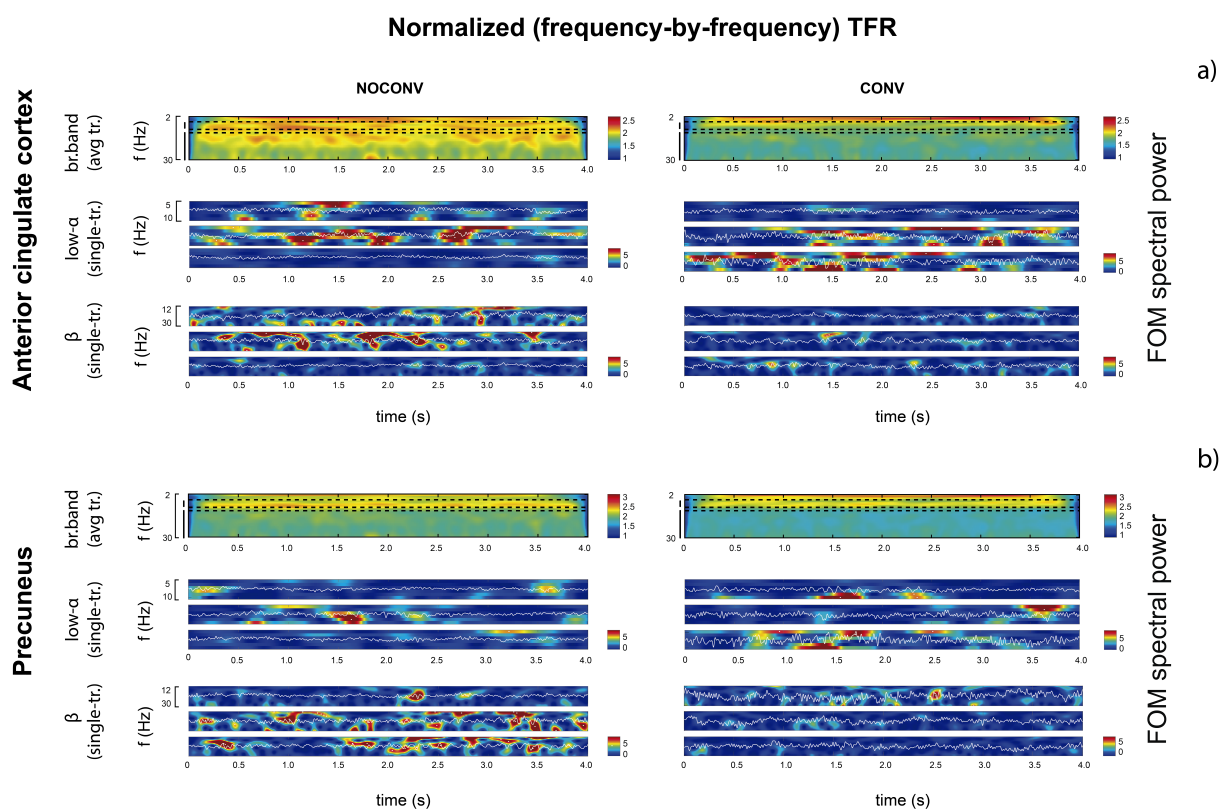

Figure 3: Time-Frequency representations of spectral events in PC (a), and ACC (b) for non-converters (NOCONV, left) and converters (CONV, right) groups. For each case, we show the representative averaged broadband TFR (top), as well as three TFR related to randomly chosen trials for low-alpha (middle), and beta (bottom) band.

207 The PSD plots of Figure 2 rely on Fourier analysis performed on averaged epochs of brain activity from  
208 the two different groups. As described previously, differences in averaged power across patient groups  
209 could emerge from several features in transient of high-power activity (i.e., *events*) in the unaveraged  
210 data.

211 Visual inspection of time-frequency representations in Figure 3 shows that seemingly continuous high  
212 average power in the alpha and beta bands (top panels) is the result of the accumulation of transient

213 high power activity ('events') across epochs of the unaveraged resting-state data (Figure 3 middle and  
 214 bottom panels) for both groups.

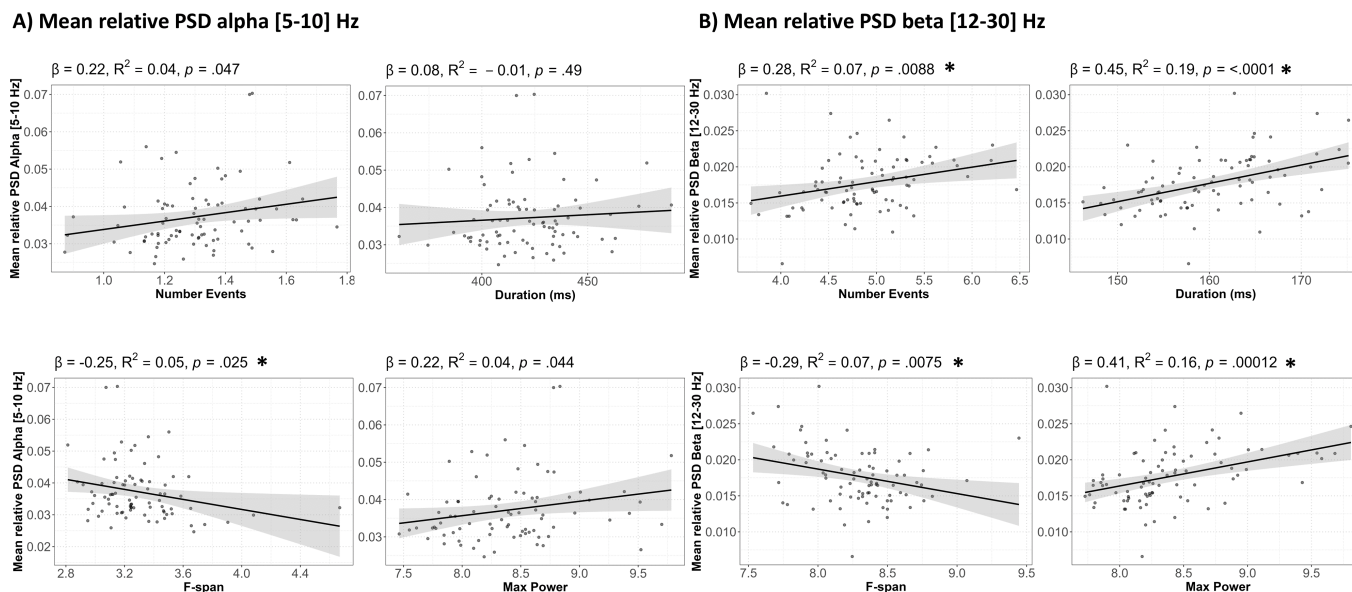

Figure 4: Diminished expression of event features in ACC and PC is associated with reduced mean power spectral density (PSD). A) Regression analysis between alpha [5-10] Hz spectral events and averaged alpha power. B) Regression analysis between beta [12-30] Hz spectral events and averaged beta power. Statistically significant p-values after BH correction are reported as  $*p < 0.05 (Q = 0.05)$ .

215 As such, higher averaged power could be due to increased expression in several features, including a higher  
 216 number of events (rate), longer duration events, increased frequency spans and or increased power of  
 217 the event. To assess if these features contributed to averaged power in our sample, we performed a  
 218 regression analysis between each feature and averaged alpha and beta power (Figure 4). Our results  
 219 show a strong correlation with averaged power and each event features in the beta band (number:  
 220  $\beta = .28, R^2 = .069, p - value = .0088$ ; duration:  $\beta = .45, R^2 = .192, p - value < .0001$ ; max power:  
 221  $\beta = .41, R^2 = .156, p - value = .0001$ , frequency span:  $\beta = -.29, R^2 = .07, p - value = .0075$ ).  
 222 While similar relationships occurred between alpha event features and averaged alpha power, only alpha  
 223 event frequency span significantly correlated with averaged alpha power after correction for multiple  
 224 comparisons and the effect was weaker than in the beta band (frequency span:  $\beta = -.25, R^2 = .05,$   
 225  $p - value = .025$ ).

3.3 Reduced beta event features as predictive biomarkers of AD conversion and cognitive decline 13

| Freq.                  | ROI | Feature  | CONV         | NOCONV       | t Stat         | p        | Cohen d |
|------------------------|-----|----------|--------------|--------------|----------------|----------|---------|
|                        |     |          | Mean ± SD    | Mean ± SD    |                |          |         |
| Low-alpha<br>[5-10] Hz | ACC | Ev.rate  | 1.32 ± 0.25  | 1.30 ± 0.31  | t(165) = 0.41  | 0.343    | -0.12   |
|                        |     | Duration | 419.6 ± 28.9 | 426.2 ± 32.3 | t(168) = -1.40 | 0.918    | 0.17    |
|                        |     | Fspan    | 3.33 ± 0.39  | 3.24 ± 0.30  | t(168) = 1.67  | 0.048    | -0.26   |
|                        |     | Pow.FOM  | 8.39 ± 0.56  | 8.51 ± 0.94  | t(144) = -1.02 | 0.844    | 0.04    |
|                        | PC  | Ev.rate  | 1.50 ± 0.34  | 1.50 ± 0.31  | t(162) = 0.13  | 0.450    | -0.08   |
|                        |     | Duration | 432.5 ± 34.4 | 445.4 ± 51.4 | t(153) = -1.93 | 0.972    | 0.18    |
|                        |     | Fspan    | 3.33 ± 0.41  | 3.44 ± 0.45  | t(168) = -1.59 | 0.943    | 0.27    |
|                        |     | Pow.FOM  | 8.99 ± 1.00  | 9.19 ± 1.19  | t(166) = -1.17 | 0.878    | 0.16    |
| Beta<br>[12-30] Hz     | ACC | Ev.rate  | 4.84 ± 0.63  | 4.92 ± 0.69  | t(168) = -0.77 | 0.222    | 0.11    |
|                        |     | Duration | 158.3 ± 8.0  | 161.7 ± 7.3  | t(164) = -2.93 | 0.002 ** | 0.48    |
|                        |     | Fspan    | 8.32 ± 0.41  | 8.26 ± 0.36  | t(161) = 1.01  | 0.844    | -0.05   |
|                        |     | Pow.FOM  | 8.38 ± 0.51  | 8.43 ± 0.51  | t(167) = -0.63 | 0.266    | 0.09    |
|                        | PC  | Ev.rate  | 4.94 ± 0.72  | 5.31 ± 0.82  | t(167) = -3.10 | 0.001 ** | 0.44    |
|                        |     | Duration | 159.6 ± 9.4  | 163.3 ± 11.5 | t(168) = -2.25 | 0.013 *  | 0.28    |
|                        |     | Fspan    | 8.54 ± 0.50  | 8.44 ± 0.43  | t(161) = 1.42  | 0.921    | -0.18   |
|                        |     | Pow.FOM  | 8.39 ± 0.46  | 8.78 ± 0.86  | t(168) = -3.69 | 0.000 ** | 0.50    |

Table 2: Statistical comparison of event features averaged for CONV and NOCONV groups in low-alpha [5-10] Hz and beta [12-30] Hz frequency bands and x6 FOM. Significant differences after BH correction ( $p < 0.05$ ) are marked with the asterisk (\*\*). Statistical tendency ( $p < 0.1$ ) are marked with the asterisk (\*).

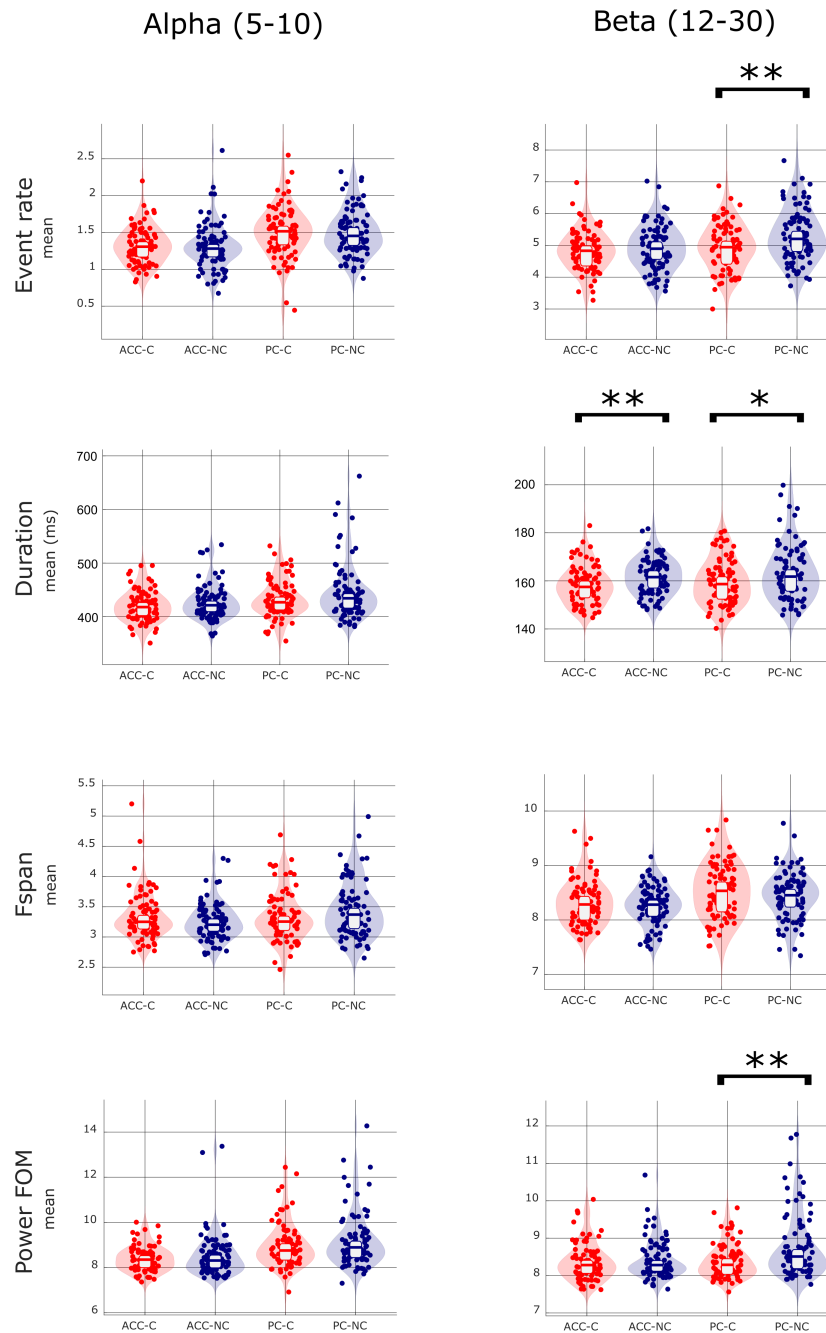

Figure 5: Mean and distribution of event features for AD converters (CN) and non-converters (NC) in alpha [5-10] Hz and beta [12-30] Hz frequency bands. T-test statistically significant p-values ( $p < 0.05$ ) after BH correction are marked with the asterisk (\*\*). Statistical tendency ( $p < 0.1$ ) are marked with the asterisk (\*).

### 3.3 Reduced beta event features as predictive biomarkers of AD conversion and cognitive decline

Given the event like nature of alpha and beta, we next tested the hypothesis that the slowing observed differences across groups in averaged PSD power in Figure 2 was due to across group differences in event features, namely rate, power, duration and/or frequency-span. We found effects only in the beta band that were more prominent in PC, such that CONV had a lower mean rate of beta events, lower power events, and a trend to shorter duration beta events in PC. Shorter duration beta events were also present in ACC in the CONV group (Figure 5 and Table 2; rate in PC  $p - value_{BH} = .003$ , power in PC  $p - value_{BH} = .002$ , duration in PC  $p - value_{BH} = .051$ ; duration in ACC  $p - value_{BH} = .01$ , see also Supplementary Figure 2 and Figure 3 for further summary statistics). Notably, the effect size for differences between CONV and NOCONV in these features are of medium size (*Cohen d* > 0.4), see Table 2).

The fact that our method allows us to explain differences in beta band, but not in alpha band, could reflect the method's sensitivity in the alpha band. Indeed, as shown in Figure 4, in this subject sample, individual alpha event features are not a strong predictor of averaged alpha power (see also Supplementary Tables 1 & 2 for analysis of other power thresholds) and the slowing effects in the alpha band may instead be due to a combination of transient event features and/or more stationary properties of the signal.

To investigate the further predictive potential of resting-state beta event features as a biomarker for conversion from MCI to AD, we examined the association between beta event rate, duration, and maximum power and the probability of AD conversion within a 2.5-year timeframe (See Figure 6A). The probability of conversion was calculated from a logistic regression (see Methods section 2.5). Consistent with the pooled results in Figure 5, lower beta event rates, shorter duration, and reduced event power are linearly associated with an increased probability of conversion. MCI subjects with fewer than 4.92 events in four seconds of resting-state data have 1.79 (95 %CI [1.1, 3.0]) times greater odds of converting to AD ( $R^2_{Nag} = .10$ ,  $p - value = .024$ ). Those with event duration less than 159 ms have 1.06 (95 %CI [1.0, 1.1]) times greater odds of AD conversion ( $R^2_{Nag} = .06$ ,  $p - value = .008$ ), and subjects whose events have maxima power (calculated as factors of median power) less than 8.41 have 2.01 (95 %CI [1.15, 3.76]) times greater odds of AD conversion ( $R^2_{Nag} = .05$ ,  $p - value = .019$ ).

Further examination of the relationship between beta event features and cognitive performance showed that, in the CONV group, a lower rate of beta events and lower power beta events were linearly associated with greater cognitive decline (Figure 6B, lower Cognitive Performance Index values, see Methods section 2.5 *Statistical Analysis*) ( $\beta = .26$ ,  $R^2 = .07$ ,  $p - value = .016$  for number of events;  $\beta = .31$ ,  $R^2 = .10$ ,

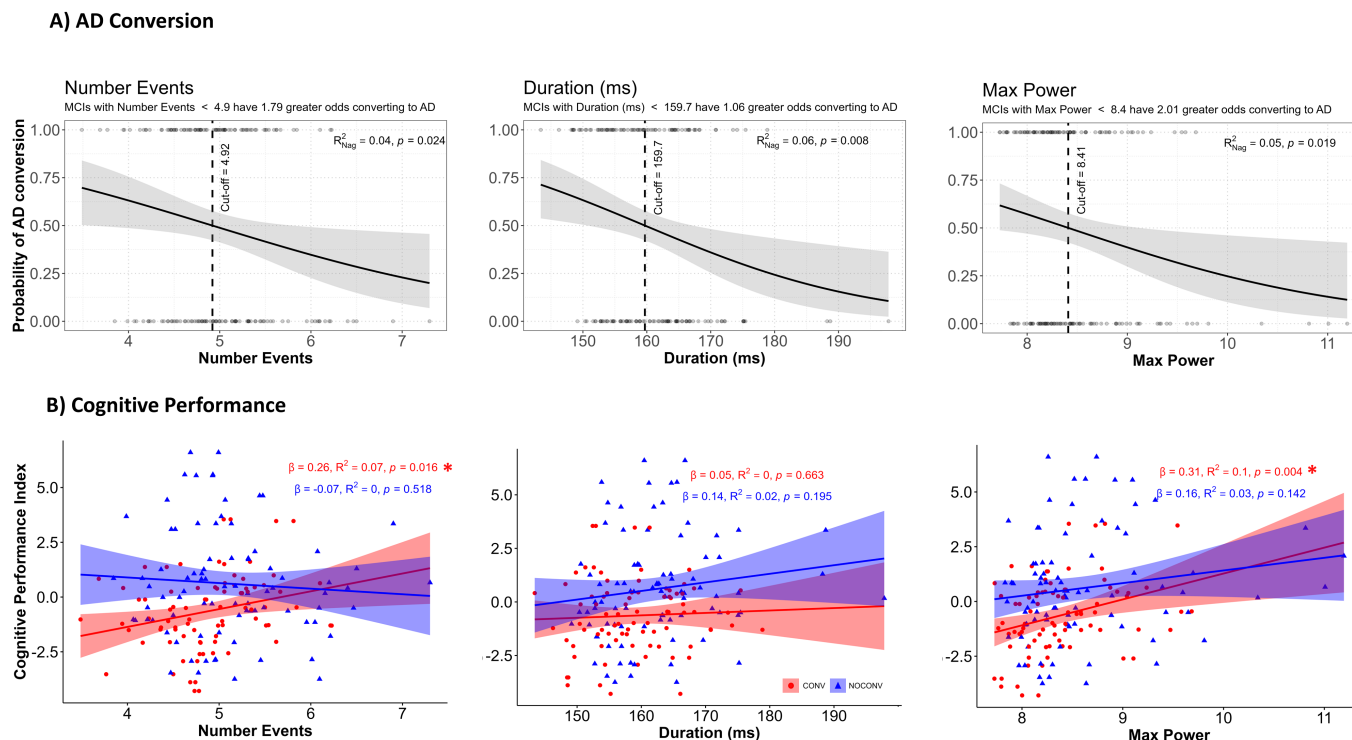

Figure 6: Diminished expression of beta event features in ACC and PC (number of events, duration, maxima power) is associated with greater odds of future AD conversion, and reduced cognitive performance. A) Logistic regression between beta event features and AD conversion within 2.5 years. B) Linear regression between beta event features and Cognitive Performance Index separated by CONV (red) and NOCONV (blue).

258  $p - value = .0041$  for maxima power). These relationships did not emerge for duration, nor appear in  
 259 NOCONVs, suggesting beta event features and particularly beta event power ( $p - value = 0.0041$ ) are  
 260 predictive of cognitive decline only in MCI patients that will convert to AD within 2.5 years.

## 261 4 Discussion

262 Resting-state M/EEG signals provide a powerful non-invasive method to examine human brain physiology  
 263 associated with AD (Bruña et al., 2023; Hsiao et al., 2013; Ishii et al., 2017; López et al., 2020; López-  
 264 Sanz et al., 2016). Oscillatory slowing has been associated with AD conversion based on PSD analysis  
 265 that relies on signal averaging. Our study shows for the first time that in non-averaged data, resting  
 266 state alpha and beta oscillations from ACC and PC are composed of transient high-power events. To  
 267 explore how transient high power events relate to findings of slowing in PSD, we studied their properties  
 268 in a sample of individuals diagnosed as MCI and characterized novel features of transient high-power



269 events that distinguish patients who later convert or do not convert to AD (i.e., CONV and NOCONV,  
270 respectively). Our analysis reveals a consistent pattern of a lower number of transient 12-30 Hz beta  
271 events, duration and power for CONV compared to NOCONV in PC, with the duration effect also  
272 occurring in ACC. This diminished beta event expression in ACC and PC was associated with increased  
273 odds of future AD conversion and decreased cognitive performance in the CONV group. It is well known  
274 that PC and ACC are part of the default mode network, which has decreased metabolism in the early  
275 stages of the disease (Greicius et al., 2004) and it is closely involved with episodic memory processing (Liu  
276 et al., 2022). Our finding of reduced event-activation in CONV is predominantly found in precuneus, a  
277 ROI typically associated with deposition of amyloid- $\beta$  in the early stages of the AD continuum (Forsberg  
278 et al., 2008).

279 Overall, our results lay the foundation for further examination of beta event features as a novel biomarker  
280 for early AD diagnosis and a possible neurobiological measures of the effectiveness of preventative in-  
281 terventions. The more fine-grained description of slowing in unaveraged MEG data may also bring us  
282 closer to understanding the underlying neural mechanisms, and a more direct link to hyperexcitability as  
283 observed in animal models (Maestú et al., 2021; Zott et al., 2019), ultimately guiding new therapeutics  
284 in humans.

## 285 **4.1 Consistency with prior studies examining beta, ageing and cognitive con-** 286 **trol**

287 Reductions in beta event expression yielded a lower PSD in the beta band [12-30] Hz averaged across  
288 trials, giving further insight into the underpinning of oscillatory slowing in AD (Bruña et al., 2023;  
289 Dauwels et al., 2011; Jelic et al., 2000). This trend is also consistent with a critical shift in beta activity  
290 at approximately 60 years of age in healthy patients (Brady et al., 2020; Power & Bardouille, 2021).  
291 Following this inflection point, resting-state relative source power, as well as beta event characteristics  
292 such as event rate, peak frequency, duration, peak power, etc., progressively begin to decline with age  
293 (Brady & Bardouille, 2022). Other studies have shown that averaged M/EEG spectral activity in the  
294 beta frequency range (13-30) Hz is a more powerful predictor of MCI-to-AD conversion than activity in  
295 other frequency bands, including in the slow alpha frequency range ((Gaubert et al., 2024; Poil et al.,  
296 2013). Thus, transient beta event features may be key factors in delineating differences and tracking the  
297 neurophysiology of healthy and pathological ageing.

298 We found that reductions in beta event features were associated with global cognitive decline, as measured  
299 by an index based on a battery of neuropsychological tests. However, this effect is only significant in the

300 CONV group. MCIs who convert to AD 2.5 years later seem to be more reliant on beta event expression  
301 for cognitive robustness.

302 Several studies have shown that beta events throughout the cortex are a signature of inhibitory control.  
303 In sensory cortex, beta event expression can be manipulated with attention (increasing in non-attentive  
304 states), and an increase in beta event rates is associated with a decrease in perceptual salience (Shin  
305 et al., 2017), a process predicted to be mediated by an increase in inhibitory neuron activity (Law et al.,  
306 2022). In motor cortex, increased beta event expression is associated with inhibited motor control and  
307 Parkinson's disease (Yu et al., 2021), and in frontal cortex beta events are a signature of stopping of  
308 movement and long-term memory retrieval (Schmidt et al., 2019; Wessel, 2020). Conversely, reduction in  
309 beta event rates in frontal cortex has been explicitly linked to encoding and decoding in working memory  
310 processes, where they have been suggested as a mechanism for volitional control and memory content  
311 reactivation (Lundqvist et al., 2016, 2018; Spitzer & Haegens, 2017). Likewise, decreased posterior  
312 parietal beta oscillatory activity predicts episodic memory formation and retrieval (Griffiths, Martín-  
313 Buro, Staresina, Hanslmayr, & Staudigl, 2021; Nyhus, 2018), and is correlated with enhanced memory  
314 performance (Griffiths, Martín-Buro, Staresina, & Hanslmayr, 2021). Transcranial stimulation of the  
315 prefrontal cortex at beta (18 Hz) has been found to induce memory encoding impairments (Hanslmayr  
316 et al., 2014), and during posterior parietal cortex stimulation, lower prestimulus beta power predicts  
317 higher phosphene ratings, reflecting increased neural excitability (Samaha et al., 2017).

318 The consistent relationship between beta event expression and inhibitory control in these myriad studies  
319 (Lundqvist et al., 2024) suggests that the ability to modulate beta events according to task demands is  
320 necessary for optimal function, and that the diminished resting state beta event expression and associated  
321 cognitive decline observed in the PC in CONV in our study may be directly related to lack of inhibitory  
322 cognitive control.

## 323 **4.2 Why are differences in alpha bursts not present?**

324 Despite the observation of significant across group differences in alpha band in the average PSD (Figure  
325 2), we did not find a significant relationship between transient [5-10] Hz alpha event features and averaged  
326 power, nor did we find a difference in event features between MCI patients who will convert to AD and  
327 those who will not, which is consistent with previous longitudinal studies of AD progression (Gaubert  
328 et al., 2024; Poil et al., 2013). This was true for several event detection thresholds (see Supplementary  
329 Figure 2 and Supplementary Tables 1 and 2 ).

330 Since we did not find a relationship between spectral events in the lower 5-10 Hz alpha band and averaged

### 4.3 *A mechanistic link between reduced beta event expression and hyperexcitability in CONV* 19

331 alpha power in our sample, we did not examine the relationship to cognitive performance. In terms of  
332 components of slowing, other studies have found a relationship between bursts of slow activity (1-6 Hz)  
333 age and cognition in healthy adults, where older subjects and lower cognitive performance participants  
334 exhibited longer and slower events (Power et al., 2024).

335 The lack of alpha event effects in our sample could reflect the sensitivity limitations of the spectral  
336 event detection method or indicate that, although the alpha band contains transient components, the  
337 differences between the two groups involve a combination of transient feature or more stationary features  
338 than transient ones. A slowed occipital alpha rhythm is a common biomarker of several neurological or  
339 psychiatric disorders (Hughes & Crunelli, 2005; Samson-Dollfus et al., 1997). According to the “thalamo-  
340 cortical (TC) hypothesis” (Klimesch et al., 2007; S. M. Sherman, 2001) slow cortical rhythms could be  
341 generated by TC cells in tonic, single spike, firing, or in arrhythmic bursting mode. Hugues (2005) argued  
342 that a slowing effect when shifting from alpha to theta waves could arise from the hyperpolarization of  
343 the thalamo-cortical neuron population, resulting in a deceleration of high-threshold bursting (HT) in  
344 individual cells, which could translate to a shift from bursty alpha to more continuous slower theta range  
345 oscillations. Thus, in this cognitively impaired population, while we still detect some alpha bursting,  
346 Alzheimer’s disease-related mechanisms may be disrupting thalamo-cortical connections (Eustache et al.,  
347 2016) and slowing the thalamic bursting activity, making it more stationary.

348 In the early stages of AD continuum, even before a mild cognitive impairment diagnosis, alpha disruption  
349 is a marker of cognitive decline (Babiloni et al., 2010; Bruña et al., 2023; Huang et al., 2000; López et al.,  
350 2020; López-Sanz et al., 2016). Still, when patients reach a more advanced stage of the disease, as it is  
351 mild cognitive impairment, beta band is more discriminant between AD converters and non-converters  
352 (Gaubert et al., 2024; Poil et al., 2013; Pusil, Dimitriadis, et al., 2019). Consequently, when measured  
353 in MCIs the spectral events method may not be sensitive to this transient-to-stationary shift in the alpha  
354 [5-10] Hz frequency band but can detect differences in the beta [12-30] Hz band.

### 355 **4.3 A mechanistic link between reduced beta event expression and hyperex-** 356 **citability in CONV**

357 Animal studies have suggested  $A\beta$ -induced changes in E/I balance is a mechanism for hyperexcitability  
358 and cognitive decline in Alzheimer’s disease (Maestú et al., 2021). This notion has been supported  
359 by several computational neural modeling frameworks examining causal links between disease processes  
360 and increased neuron firing rates (Alexandersen et al., 2023; Cabral et al., 2014; de Haan et al., 2017;  
361 Hutt et al., 2023; Nakagawa et al., 2014; Stefanovski et al., 2019; Zimmermann et al., 2018), albeit

362 without explicit consideration of the biophysical generators of MEG current sources or of beta frequency  
363 oscillations.

364 Modeling work by our group specifically designed to interpret the detailed cell and circuit origin of localized  
365 MEG (and EEG) current source signals (Neymotin et al., 2020) provides a hypothesized direct mechanistic  
366 link between beta event expression and hyperexcitability in CONV. Specifically, our prior modeling and  
367 cross-species empirical studies suggested neocortical beta events are generated by bursts of exogenous  
368 thalamocortical drive that targets excitatory synapses on the proximal and distal dendrites of pyramidal  
369 neurons in deep and superficial neocortical layers, such that the distal drive is stronger and last a beta  
370 period (i.e.  $\approx 50$ ms) (Jones et al., 2009; M. A. Sherman et al., 2016). This thalamic burst drive induces  
371 current flow in pyramidal neuron dendrites that generates MEG beta event waveform characteristics  
372 consistent with those observed experimentally in sensory, motor and frontal cortices (Bonaiuto et al.,  
373 2021; M. A. Sherman et al., 2016), and when occurring rhythmically can produce multiple beta cycles  
374 and/or a complex of alpha and beta activity (Jones et al., 2009). Follow-up studies predicted further  
375 that the thalamic drive inducing a beta event also activates inhibitory neurons in supragranular layers,  
376 providing a causal mechanism for beta-associated inhibitory control (Law et al., 2022; Shin et al., 2017).  
377 Together with our current findings that CONV have reduced beta expression (namely lower event rates,  
378 power and duration), these prior studies suggest CONV have a reduction in thalamocortical burst drive  
379 to cortex, which in turn recruits less cortical inhibitory neuron activity leading to hyperexcitability.

380 Such a decrease in inhibitory activity could contribute to the observation of diminished Gabaergic terminals  
381 on cortical neurons near amyloid plaques, in addition to the toxic effects of amyloid oligomers on inhibitory  
382 terminals (Alexandersen et al., 2023; Garcia-Marin et al., 2009), particularly in PC which exhibits  $A\beta$   
383 deposition in the early stages of AD. The predicted reduction in thalamic bursting is also synergistic  
384 with studies showing thalamic atrophy and reduced inhibitory thalamic tone (Abuhassan et al., 2014;  
385 Forno et al., 2023), as inhibition from the thalamic reticular nucleus is known to be a driver of rebound  
386 bursting mechanisms in thalamic relay cells (Destexhe & Sejnowski, 2002). Moreover, decreases in  
387 thalamocortical drive are consistent with theories of thalamocortical dysrhythmia (Llinás et al., 1999)  
388 and could contribute to loss of cortical signal complexity and biophysical heterogeneity (Szul et al., 2023)  
389 occurring with the disease and thought to be an important homeostatic control mechanisms capable of  
390 bolstering the network's resilience to perturbations, such as the toxic effects of amyloid (Dauwels et al.,  
391 2011; Hutt et al., 2023).

## 392 Supplementary Material

### 393 “Mirror” events

394 The MEG activity of medial regions is characterized by the presence of synchronized, contralateral, spu-  
395 rious mirror events (see TFRs in Figure S1). This phenomenon is caused by the limited resolution of  
396 MEG/volume conduction. When using the MNE dipole-constrained source reconstruction method, these  
397 duplicated events are noticeable because they are characterized by a mutual inversion of the time series.  
398 We performed a removal step of duplicated mirror events: when two detected events shared the same  
399 (but contralateral) ROI, epoch, time and frequency, we discarded the one with lower amplitude.

400

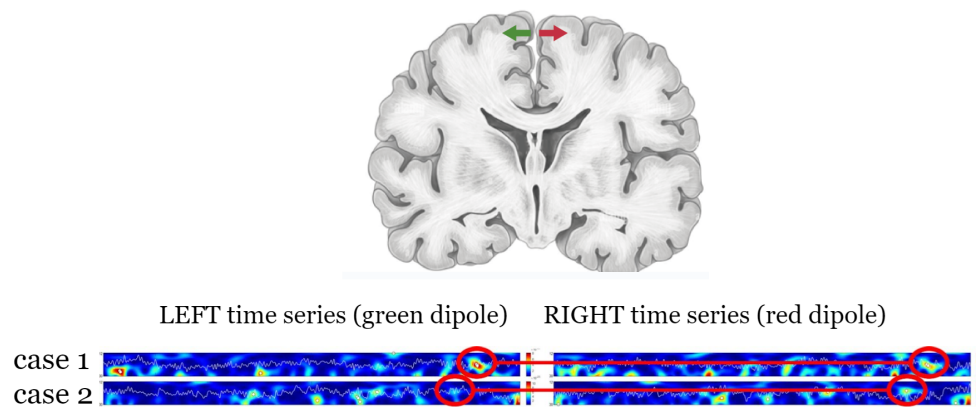

Figure 1: Example of mirror event in left ACC and right ACC due to spatial smearing in source reconstruction. The events considered at the end of the detection process were the left one in the case1, and the right one in the case2, due to their amplitudes.

401 **Event threshold analysis**

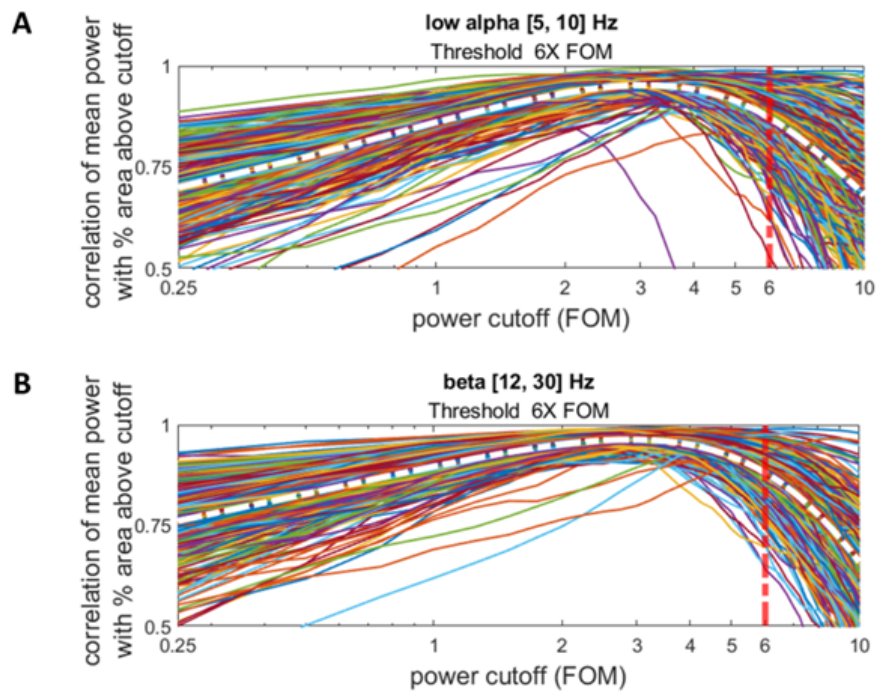

Figure 2: Average relationship between power cutoff FOM and correlation of mean power with percentage of area above cutoff. a) Analysis over events selected in alpha frequency [5-10] Hz and visualisation of 6X threshold (red line). b) Analysis over events selected in beta frequency [12-30] Hz and visualisation of 6X threshold (red line).

4.3 A mechanistic link between reduced beta event expression and hyperexcitability in CONV

| Freq.               | ROI | Feature  | t-Stat | p-value | BH adjusted p-value | Cohen d |
|---------------------|-----|----------|--------|---------|---------------------|---------|
| Low alpha [5-10] Hz | ACC | Ev. Rate | 1,705  | 0,045   | 0,18                | -0,226  |
|                     |     | Duration | -2,084 | 0,981   | 0,993               | 0,258   |
|                     |     | Fspan    | 1,484  | 0,07    | 0,203               | -0,126  |
|                     |     | Pow.FOM  | -1,11  | 0,866   | 0,993               | 0,078   |
|                     | PC  | Ev. Rate | 1,113  | 0,134   | 0,267               | -0,188  |
|                     |     | Duration | -2,507 | 0,993   | 0,993               | 0,376   |
|                     |     | Fspan    | -1,453 | 0,926   | 0,993               | 0,267   |
|                     |     | Pow.FOM  | -1,221 | 0,888   | 0,993               | 0,16    |
| Beta [12-30] Hz     | ACC | Ev. Rate | 1,716  | 0,956   | 0,993               | -0,217  |
|                     |     | Duration | -2,67  | 0,004   | 0,033 **            | 0,383   |
|                     |     | Fspan    | 1,241  | 0,892   | 0,993               | -0,086  |
|                     |     | Pow.FOM  | -1,438 | 0,076   | 0,203               | 0,224   |
|                     | PC  | Ev. Rate | -1,183 | 0,119   | 0,267               | 0,194   |
|                     |     | Duration | -2,37  | 0,009   | 0,05 *              | 0,336   |
|                     |     | Fspan    | 2,213  | 0,986   | 0,993               | -0,358  |
|                     |     | Pow.FOM  | -3,744 | 0       | 0,002 **            | 0,561   |

Table 1: Statistical comparison for x4 FOM of event features mean averaged for CONV and NOCONV groups in low-alpha [5-10] Hz and beta [12-30] Hz frequency bands. Significant differences ( $p < 0.05$ ) are marked with the asterisk (\*\*). Statistical tendency ( $p < 0.1$ ) is marked with the asterisk (\*).

| Freq.               | ROI | Feature  | t-Stat | p-value | BH adjusted p-value | Cohen d |
|---------------------|-----|----------|--------|---------|---------------------|---------|
| Low alpha [5-10] Hz | ACC | Ev. Rate | -0,497 | 0,69    | 0,91                | -0,077  |
|                     |     | Duration | 0,679  | 0,249   | 0,639               | -0,247  |
|                     |     | Fspan    | 0,082  | 0,467   | 0,91                | 0,037   |
|                     |     | Pow.FOM  | -0,33  | 0,629   | 0,91                | -0,029  |
|                     | PC  | Ev. Rate | -0,585 | 0,72    | 0,91                | 0,078   |
|                     |     | Duration | -0,959 | 0,831   | 0,91                | 0,047   |
|                     |     | Fspan    | -1,052 | 0,853   | 0,91                | 0,164   |
|                     |     | Pow.FOM  | -0,804 | 0,789   | 0,91                | 0,162   |
| Beta [12-30] Hz     | ACC | Ev. Rate | -0,585 | 0,28    | 0,639               | 0,095   |
|                     |     | Duration | -1,831 | 0,034   | 0,138               | 0,287   |
|                     |     | Fspan    | 0,295  | 0,616   | 0,91                | -0,007  |
|                     |     | Pow.FOM  | -0,973 | 0,166   | 0,531               | 0,083   |
|                     | PC  | Ev. Rate | -3,446 | 0       | 0,003 **            | 0,466   |
|                     |     | Duration | -2,221 | 0,014   | 0,074 *             | 0,317   |
|                     |     | Fspan    | 1,721  | 0,956   | 0,956               | -0,22   |
|                     |     | Pow.FOM  | -3,602 | 0       | 0,003 **            | 0,498   |

Table 2: Statistical comparison for x8 FOM of event features mean averaged for CONV and NOCONV groups in low-alpha [5-10] Hz and beta [12-30] Hz frequency bands. Significant differences ( $p < 0.05$ ) are marked with the asterisk (\*\*). Statistical tendency ( $p < 0.1$ ) is marked with the asterisk (\*).

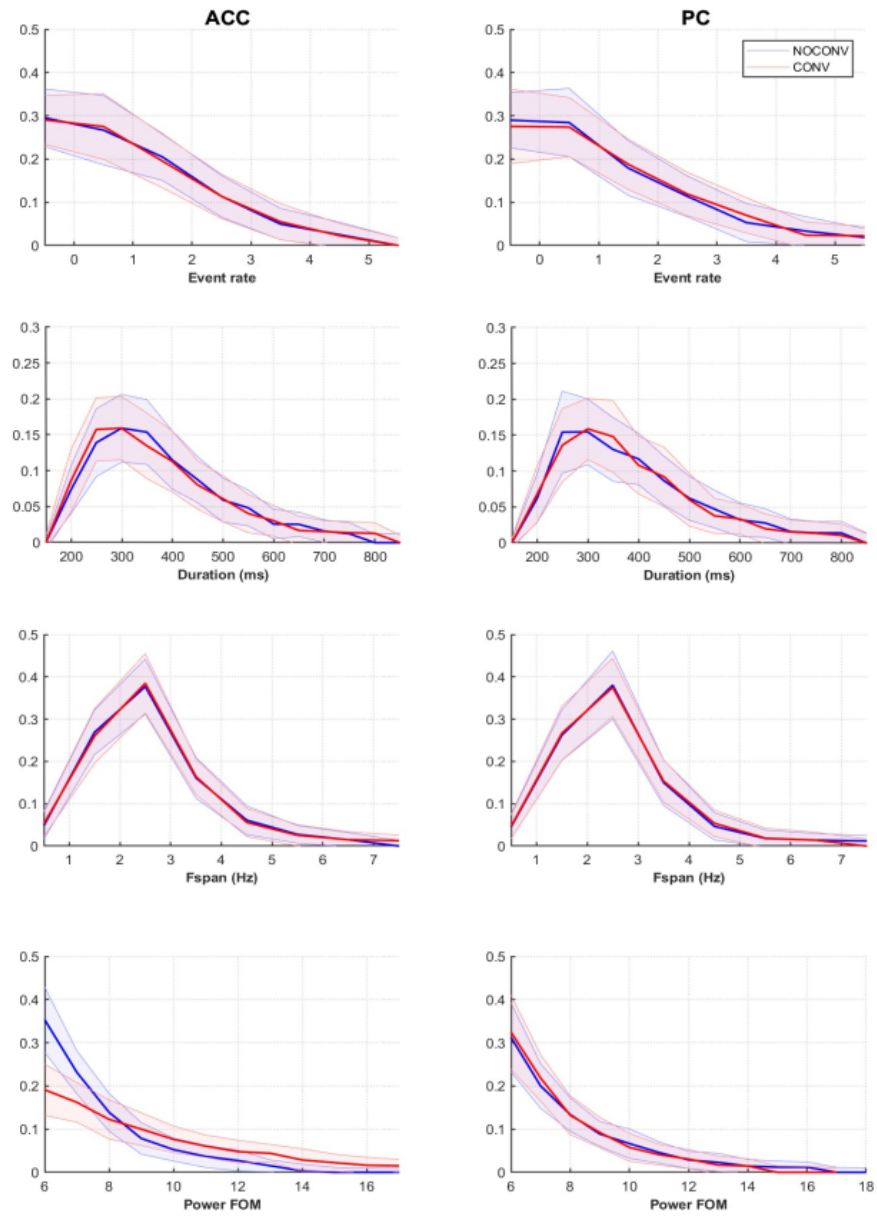

Figure 3: Probability density plots for each event features in low-alpha [5-10] Hz band for 4 seconds trials.



### 4.3 A mechanistic link between reduced beta event expression and hyperexcitability in CONV

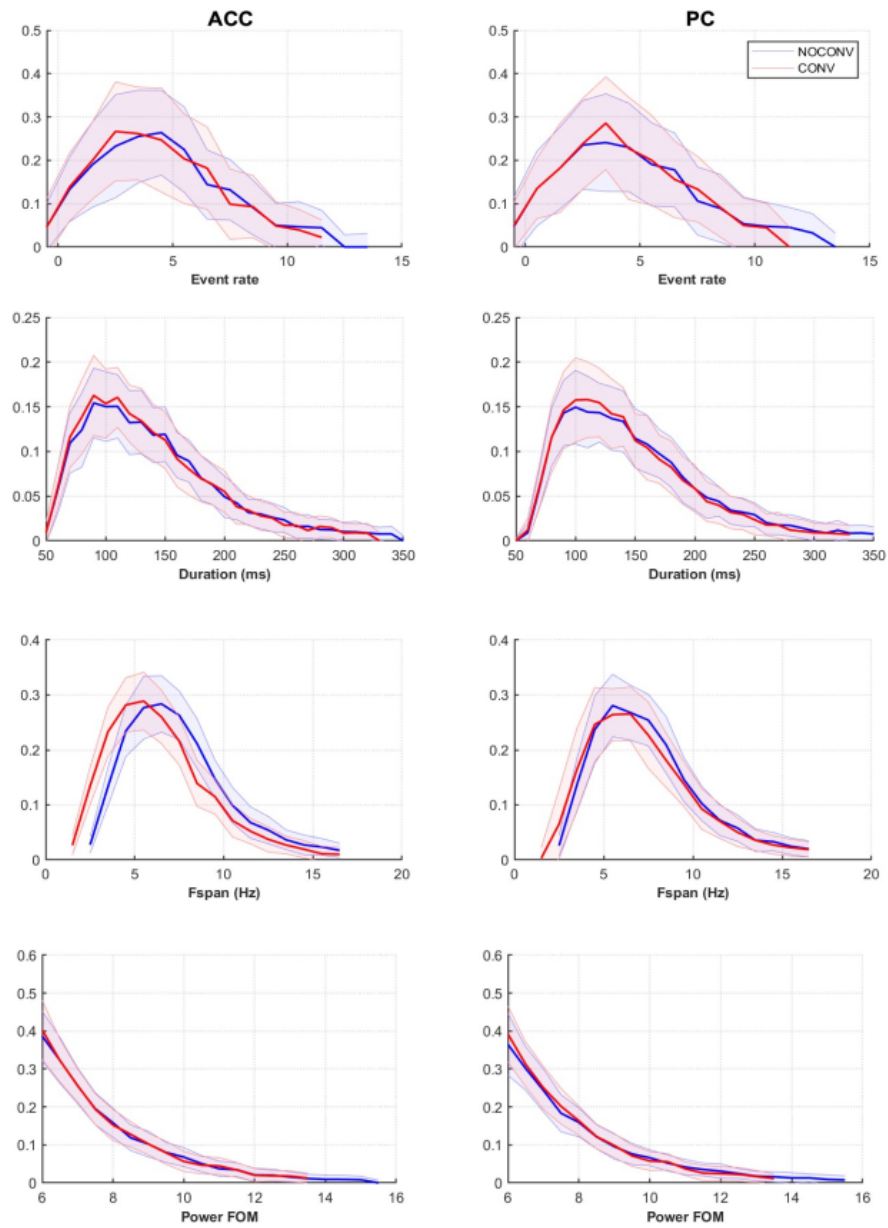

Figure 4: Probability density plots for each event features in beta [12-30] Hz band for 4 seconds trials.

## References

- 403 Abuhassan, K., Coyle, D., & Maguire, L. (2014). Compensating for thalamocortical synaptic loss in  
404 alzheimer's disease. *Front. Comput. Neurosci.*, *8*, 65.
- 405 Agrell, B., & Dehlin, O. (1998). The clock-drawing test. *Age and ageing*, *27*(3), 399–404.
- 406 Albert, M. S., DeKosky, S. T., Dickson, D., Dubois, B., Feldman, H. H., Fox, N. C., Gamst, A., Holtzman,  
407 D. M., Jagust, W. J., Petersen, R. C., et al. (2013). The diagnosis of mild cognitive impairment  
408 due to alzheimer's disease: Recommendations from the national institute on aging-alzheimer's  
409 association workgroups on diagnostic guidelines for alzheimer's disease. *Focus*, *11*(1), 96–106.
- 410 Alexandersen, C. G., de Haan, W., Bick, C., & Goriely, A. (2023). A multi-scale model explains oscillatory  
411 slowing and neuronal hyperactivity in alzheimer's disease. *J. R. Soc. Interface*, *20*(198), 20220607.
- 412 Algina, J., Keselman, H. J., & Penfield, R. D. (2005). An alternative to cohen's standardized mean  
413 difference effect size: A robust parameter and confidence interval in the two independent groups  
414 case. *Psychol. Methods*, *10*(3), 317–328.
- 415 Babiloni, C., Binetti, G., Cassetta, E., Cerboneschi, D., Dal Forno, G., Del Percio, C., Ferreri, F., Ferri,  
416 R., Lanuzza, B., Miniussi, C., Moretti, D. V., Nobili, F., Pascual-Marqui, R. D., Rodriguez,  
417 G., Romani, G. L., Salinari, S., Tecchio, F., Vitali, P., Zanetti, O., ... Rossini, P. M. (2004).  
418 Mapping distributed sources of cortical rhythms in mild alzheimer's disease. a multicentric EEG  
419 study. *Neuroimage*, *22*(1), 57–67.
- 420 Babiloni, C., Frisoni, G. B., Pievani, M., Vecchio, F., Lizio, R., Buttiglione, M., Geroldi, C., Fracassi, C.,  
421 Eusebi, F., Ferri, R., & Rossini, P. M. (2009). Hippocampal volume and cortical sources of EEG  
422 alpha rhythms in mild cognitive impairment and alzheimer disease. *Neuroimage*, *44*(1), 123–135.
- 423 Babiloni, C., Visser, P. J., Frisoni, G., De Deyn, P. P., Bresciani, L., Jelic, V., Nagels, G., Rodriguez,  
424 G., Rossini, P. M., Vecchio, F., Colombo, D., Verhey, F., Wahlund, L.-O., & Nobili, F. (2010).  
425 Cortical sources of resting EEG rhythms in mild cognitive impairment and subjective memory  
426 complaint. *Neurobiol. Aging*, *31*(10), 1787–1798.
- 427 Bang, J., Spina, S., & Miller, B. L. (2015). Frontotemporal dementia. *Lancet*, *386*(10004), 1672–1682.
- 428 Benjamini, Y., & Hochberg, Y. (1995). Controlling the false discovery rate: A practical and powerful  
429 approach to multiple testing. *J. R. Stat. Soc.*, *57*(1), 289–300.
- 430 Benton, A., Hamsher, d. S., & Sivan, A. (1994). Controlled oral word association test. *Archives of Clinical*  
431 *Neuropsychology*.
- 432 Bonaiuto, J. J., Little, S., Neymotin, S. A., Jones, S. R., Barnes, G. R., & Bestmann, S. (2021). Laminar  
433 dynamics of high amplitude beta bursts in human motor cortex. *Neuroimage*, *242*, 118479.
- 434 Bowie, C. R., & Harvey, P. D. (2006). Administration and interpretation of the trail making test. *Nature*  
435 *protocols*, *1*(5), 2277–2281.

## REFERENCES

- 436 Brady, B., & Bardouille, T. (2022). Periodic/Aperiodic parameterization of transient oscillations (PAPTO)–  
437 Implications for healthy ageing. *Neuroimage*, *251*, 118974.
- 438 Brady, B., Power, L., & Bardouille, T. (2020). Age-related trends in neuromagnetic transient beta  
439 burst characteristics during a sensorimotor task and rest in the Cam-CAN open-access dataset.  
440 *Neuroimage*, *222*, 117245.
- 441 Bruña, R., López-Sanz, D., Maestú, F., Cohen, A. D., Bagic, A., Huppert, T., Kim, T., Roush, R. E.,  
442 Snitz, B., & Becker, J. T. (2023). MEG oscillatory slowing in cognitive impairment is associated  
443 with the presence of subjective cognitive decline. *Clin. EEG Neurosci.*, *54*(1), 73–81.
- 444 Cabral, J., Luckhoo, H., Woolrich, M., Joensson, M., Mohseni, H., Baker, A., Kringelbach, M. L., & Deco,  
445 G. (2014). Exploring mechanisms of spontaneous functional connectivity in MEG: How delayed  
446 network interactions lead to structured amplitude envelopes of band-pass filtered oscillations.  
447 *Neuroimage*, *90*, 423–435.
- 448 Cho, H., Choi, J. Y., Hwang, M. S., Kim, Y. J., Lee, H. M., Lee, H. S., Lee, J. H., Ryu, Y. H., Lee,  
449 M. S., & Lyoo, C. H. (2016). In vivo cortical spreading pattern of tau and amyloid in the alzheimer  
450 disease spectrum. *Ann. Neurol.*, *80*(2), 247–258.
- 451 da Silva, F. L. (2013). Eeg and meg: Relevance to neuroscience. *Neuron*, *80*(5), 1112–1128.
- 452 Dauwels, J., Srinivasan, K., Ramasubba Reddy, M., Musha, T., Vialatte, F.-B., Latchoumane, C., Jeong,  
453 J., & Cichocki, A. (2011). Slowing and loss of complexity in alzheimer’s EEG: Two sides of the  
454 same coin? *Int. J. Alzheimers. Dis.*, *2011*, 539621.
- 455 de Haan, W., van Straaten, E. C. W., Gouw, A. A., & Stam, C. J. (2017). Altering neuronal excitability  
456 to preserve network connectivity in a computational model of alzheimer’s disease. *PLoS Comput.*  
457 *Biol.*, *13*(9), e1005707.
- 458 Destexhe, A., & Sejnowski, T. J. (2002). The initiation of bursts in thalamic neurons and the cortical  
459 control of thalamic sensitivity. *Philos. Trans. R. Soc. Lond. B Biol. Sci.*, *357*(1428), 1649–1657.
- 460 Eustache, P., Nemmi, F., Saint-Aubert, L., Pariente, J., & Péran, P. (2016). Multimodal magnetic  
461 resonance imaging in alzheimer’s disease patients at prodromal stage. *J. Alzheimers. Dis.*, *50*(4),  
462 1035–1050.
- 463 Forno, G., Saranathan, M., Contador, J., Guillen, N., Falgàs, N., Tort-Merino, A., Balasa, M., Sanchez-  
464 Valle, R., Hornberger, M., & Lladó, A. (2023). Thalamic nuclei changes in early and late onset  
465 alzheimer’s disease. *Curr Res Neurobiol*, *4*, 100084.
- 466 Forsberg, A., Engler, H., Almkvist, O., Blomquist, G., Hagman, G., Wall, A., Ringheim, A., Långström,  
467 B., & Nordberg, A. (2008). Pet imaging of amyloid deposition in patients with mild cognitive  
468 impairment. *Neurobiology of aging*, *29*(10), 1456–1465.

- 469 Garcia-Marin, V., Blazquez-Llorca, L., Rodriguez, J.-R., Boluda, S., Muntane, G., Ferrer, I., & Defelipe,  
470 J. (2009). Diminished perisomatic GABAergic terminals on cortical neurons adjacent to amyloid  
471 plaques. *Front. Neuroanat.*, *3*, 28.
- 472 Gaubert, S., Garces, P., Hipp, J., Bruña, R., Lopéz, M. E., Maestu, F., Vaghari, D., Henson, R., Paquet,  
473 C., & Engemann, D. (2024). Exploring the neuromagnetic signatures of cognitive decline from  
474 mild cognitive impairment to alzheimer's disease dementia. *medRxiv*, 2024-07.
- 475 Greicius, M. D., Srivastava, G., Reiss, A. L., & Menon, V. (2004). Default mode network activity distin-  
476 guishes alzheimer's disease from healthy aging: Evidence from functional mri. *Proceedings of the*  
477 *National Academy of Sciences*, *101*(13), 4637-4642.
- 478 Griffiths, B. J., Martín-Buro, M. C., Staresina, B. P., & Hanslmayr, S. (2021). Disentangling neocortical  
479 alpha/beta and hippocampal theta/gamma oscillations in human episodic memory formation.  
480 *Neuroimage*, *242*, 118454.
- 481 Griffiths, B. J., Martín-Buro, M. C., Staresina, B. P., Hanslmayr, S., & Staudigl, T. (2021). Alpha/beta  
482 power decreases during episodic memory formation predict the magnitude of alpha/beta power  
483 decreases during subsequent retrieval. *Neuropsychologia*, *153*, 107755.
- 484 Hämäläinen, M. S., & Ilmoniemi, R. J. (1994). Interpreting magnetic fields of the brain: Minimum norm  
485 estimates. *Med. Biol. Eng. Comput.*, *32*(1), 35-42.
- 486 Hanslmayr, S., Matuschek, J., & Fellner, M.-C. (2014). Entrainment of prefrontal beta oscillations induces  
487 an endogenous echo and impairs memory formation. *Curr. Biol.*, *24*(8), 904-909.
- 488 Health Organization, W. (2017). Consultation on the development of the global dementia observatory,  
489 world health organization, geneva, 5-6 july 2016: Meeting report [Accessed: 2023-10-19].
- 490 Hoshi, H., Hirata, Y., Kobayashi, M., Sakamoto, Y., Fukasawa, K., Ichikawa, S., Poza, J., Rodríguez-  
491 González, V., Gómez, C., & Shigihara, Y. (2022). Distinctive effects of executive dysfunction and  
492 loss of learning/memory abilities on resting-state brain activity. *Sci. Rep.*, *12*(1), 3459.
- 493 Hsiao, F.-J., Wang, Y.-J., Yan, S.-H., Chen, W.-T., & Lin, Y.-Y. (2013). Altered oscillation and synchro-  
494 nization of default-mode network activity in mild alzheimer's disease compared to mild cognitive  
495 impairment: An electrophysiological study. *PLoS One*, *8*(7), e68792.
- 496 Huang, C., Wahlund, L., Dierks, T., Julin, P., Winblad, B., & Jelic, V. (2000). Discrimination of  
497 alzheimer's disease and mild cognitive impairment by equivalent EEG sources: A cross-sectional  
498 and longitudinal study. *Clin. Neurophysiol.*, *111*(11), 1961-1967.
- 499 Hughes, S. W., & Crunelli, V. (2005). Thalamic mechanisms of EEG alpha rhythms and their pathological  
500 implications. *Neuroscientist*, *11*(4), 357-372.
- 501 Hutt, A., Rich, S., Valiante, T. A., & Lefebvre, J. (2023). Intrinsic neural diversity quenches the dynamic  
502 volatility of neural networks. *Proc. Natl. Acad. Sci. U. S. A.*, *120*(28), e2218841120.

## REFERENCES

29

- 503 Ishii, R., Canuet, L., Aoki, Y., Hata, M., Iwase, M., Ikeda, S., Nishida, K., & Ikeda, M. (2017). Healthy  
504 and pathological brain aging: From the perspective of oscillations, functional connectivity, and  
505 signal complexity. *Neuropsychobiology*, *75*(4), 151–161.
- 506 Jelic, V., Johansson, S. E., Almkvist, O., Shigeta, M., Julin, P., Nordberg, A., Winblad, B., & Wahlund,  
507 L. O. (2000). Quantitative electroencephalography in mild cognitive impairment: Longitudinal  
508 changes and possible prediction of alzheimer's disease. *Neurobiology of aging*, *21*(4), 533–540.
- 509 Jeong, J. (2004). Eeg dynamics in patients with alzheimer's disease. *Clinical neurophysiology*, *115*(7),  
510 1490–1505.
- 511 Jones, S. R. (2016). When brain rhythms aren't 'rhythmic': Implication for their mechanisms and meaning.  
512 *Curr. Opin. Neurobiol.*, *40*, 72–80.
- 513 Jones, S. R., Pritchett, D. L., Sikora, M. A., Stufflebeam, S. M., Hämäläinen, M., & Moore, C. I.  
514 (2009). Quantitative analysis and biophysically realistic neural modeling of the MEG mu rhythm:  
515 Rhythmogenesis and modulation of sensory-evoked responses. *J. Neurophysiol.*, *102*(6), 3554–  
516 3572.
- 517 Kaplan, E., Goodglass, H., & Weintraub, S. (1983). *The boston naming test*. Philadelphia, PA: Lea  
518 Febiger.
- 519 Kavanaugh, B. C., Fukuda, A. M., Gemelli, Z. T., Thorpe, R., Tirrell, E., Vigne, M., Jones, S. R., &  
520 Carpenter, L. L. (2023). Pre-treatment frontal beta events are associated with executive dysfunc-  
521 tion improvement after repetitive transcranial magnetic stimulation for depression: A preliminary  
522 report. *Journal of Psychiatric Research*, *168*, 71–81.
- 523 Kavanaugh, B. C., Vigne, M. M., Tirrell, E., Acuff, W. L., Fukuda, A. M., Thorpe, R., Sherman, A.,  
524 Jones, S. R., Carpenter, L. L., & Tyrka, A. R. (2024). Frontoparietal beta event characteristics  
525 are associated with early life stress and psychiatric symptoms in adults. *Brain and Cognition*, *177*,  
526 106164.
- 527 Klimesch, W., Sauseng, P., & Hanslmayr, S. (2007). EEG alpha oscillations: The inhibition–timing hy-  
528 pothesis. *Brain Res. Rev.*, *53*(1), 63–88.
- 529 König, T., Prichep, L., Dierks, T., Hubl, D., Wahlund, L. O., John, E. R., & Jelic, V. (2005). Decreased  
530 eeg synchronization in alzheimer's disease and mild cognitive impairment. *Neurobiology of aging*,  
531 *26*(2), 165–171.
- 532 Law, R. G., Pugliese, S., Shin, H., Sliva, D. D., Lee, S., Neymotin, S., Moore, C., & Jones, S. R.  
533 (2022). Thalamocortical mechanisms regulating the relationship between transient beta events  
534 and human tactile perception. *Cereb. Cortex*, *32*(4), 668–688.
- 535 Liu, Y., Nour, M. M., Schuck, N. W., Behrens, T. E., & Dolan, R. J. (2022). Decoding cognition from  
536 spontaneous neural activity. *Nature Reviews Neuroscience*, *23*(4), 204–214.

- 537 Llinás, R. R., Ribary, U., Jeanmonod, D., Kronberg, E., & Mitra, P. P. (1999). Thalamocortical dysrhyth-  
538 mia: A neurological and neuropsychiatric syndrome characterized by magnetoencephalography.  
539 *Proceedings of the National Academy of Sciences*, *96*(26), 15222–15227.
- 540 López, M. E., Turrero, A., Cuesta, P., Rodríguez-Rojo, I. C., Barabash, A., Marcos, A., Maestú, F., &  
541 Fernández, A. (2020). A multivariate model of time to conversion from mild cognitive impairment  
542 to alzheimer's disease. *Geroscience*, *42*, 1715–1732.
- 543 López-Sanz, D., Bruña, R., Garcés, P., Camara, C., Serrano, N., Rodríguez-Rojo, I. C., Delgado, M. L.,  
544 Montenegro, M., López-Higes, R., Yus, M., & Maestú, F. (2016). Alpha band disruption in the  
545 AD-continuum starts in the subjective cognitive decline stage: A MEG study. *Sci. Rep.*, *6*, 37685.
- 546 López-Sanz, D., Bruña, R., Garcés, P., Martín-Buro, M. C., Walter, S., Delgado, M. L., Montenegro,  
547 M., López Higes, R., Marcos, A., & Maestú, F. (2017). Functional connectivity disruption in  
548 subjective cognitive decline and mild cognitive impairment: A common pattern of alterations.  
549 *Front. Aging Neurosci.*, *9*, 109.
- 550 Lundqvist, M., Herman, P., Warden, M. R., Brincat, S. L., & Miller, E. K. (2018). Gamma and beta  
551 bursts during working memory readout suggest roles in its volitional control. *Nat. Commun.*, *9*(1),  
552 1–12.
- 553 Lundqvist, M., Miller, E. K., Nordmark, J., Liljefors, J., & Herman, P. (2024). Beta: Bursts of cognition.  
554 *Trends Cogn. Sci.*
- 555 Lundqvist, M., Rose, J., Herman, P., Brincat, S. L., Buschman, T. J., & Miller, E. K. (2016). Gamma  
556 and beta bursts underlie working memory. *Neuron*, *90*(1), 152–164.
- 557 Maestú, F., de Haan, W., Busche, M. A., & DeFelipe, J. (2021). Neuronal excitation/inhibition imbalance:  
558 Core element of a translational perspective on alzheimer pathophysiology. *Ageing Res. Rev.*, *69*,  
559 101372.
- 560 Maris, E., & Oostenveld, R. (2007). Nonparametric statistical testing of EEG- and MEG-data. *J. Neurosci.*  
561 *Methods*, *164*(1), 177–190.
- 562 McKeon, S. D., Calabro, F., Thorpe, R. V., de la Fuente, A., Foran, W., Parr, A. C., Jones, S. R., &  
563 Luna, B. (2023). Age-related differences in transient gamma band activity during working memory  
564 maintenance through adolescence. *NeuroImage*, *274*, 120112.
- 565 McKhann, G. M., Knopman, D. S., Chertkow, H., Hyman, B. T., Jack Jr, C. R., Kawas, C. H., Klunk,  
566 W. E., Koroshetz, W. J., Manly, J. J., Mayeux, R., et al. (2011). The diagnosis of dementia  
567 due to alzheimer's disease: Recommendations from the national institute on aging-alzheimer's  
568 association workgroups on diagnostic guidelines for alzheimer's disease. *Alzheimer's & dementia*,  
569 *7*(3), 263–269.
- 570 Morris, A. T., Temereanca, S., Zandvakili, A., Thorpe, R., Sliva, D. D., Greenberg, B. D., Carpenter,  
571 L. L., Philip, N. S., & Jones, S. R. (2023). Fronto-central resting-state 15-29 hz transient beta

## REFERENCES

- 572 events change with therapeutic transcranial magnetic stimulation for posttraumatic stress disorder  
573 and major depressive disorder. *Sci. Rep.*, *13*(1), 6366.
- 574 Nakagawa, T. T., Woolrich, M., Luckhoo, H., Joensson, M., Mohseni, H., Kringelbach, M. L., Jirsa,  
575 V., & Deco, G. (2014). How delays matter in an oscillatory whole-brain spiking-neuron network  
576 model for MEG alpha-rhythms at rest. *Neuroimage*, *87*, 383–394.
- 577 Nakamura, A., Cuesta, P., Fernández, A., Arahata, Y., Iwata, K., Kuratsubo, I., Bundo, M., Hattori, H.,  
578 Sakurai, T., Fukuda, K., Washimi, Y., Endo, H., Takeda, A., Diers, K., Bajo, R., Maestú, F.,  
579 Ito, K., & Kato, T. (2018). Electromagnetic signatures of the preclinical and prodromal stages of  
580 alzheimer's disease. *Brain*, *141*(5), 1470–1485.
- 581 Neymotin, S. A., Daniels, D. S., Caldwell, B., McDougal, R. A., Carnevale, N. T., Jas, M., Moore, C. I.,  
582 Hines, M. L., Hämäläinen, M., & Jones, S. R. (2020). Human neocortical neurosolver (HNN),  
583 a new software tool for interpreting the cellular and network origin of human MEG/EEG data.  
584 *Elife*, *9*.
- 585 Nyhus, E. (2018). Brain networks related to beta oscillatory activity during episodic memory retrieval. *J.*  
586 *Cogn. Neurosci.*, *30*(2), 174–187.
- 587 Oostenveld, R., Fries, P., Maris, E., & Schoffelen, J.-M. (2011). FieldTrip: Open source software for  
588 advanced analysis of MEG, EEG, and invasive electrophysiological data. *Comput. Intell. Neurosci.*,  
589 *2011*, 156869.
- 590 Poil, S.-S., de Haan, W., van der Flier, W. M., Mansvelder, H. D., Scheltens, P., & Linkenkaer-Hansen, K.  
591 (2013). Integrative EEG biomarkers predict progression to alzheimer's disease at the MCI stage.  
592 *Front. Aging Neurosci.*, *5*, 58.
- 593 Power, L., & Bardouille, T. (2021). Age-related trends in the cortical sources of transient beta bursts  
594 during a sensorimotor task and rest. *Neuroimage*, *245*, 118670.
- 595 Power, L., Friedman, A., & Bardouille, T. (2024). Atypical paroxysmal slow cortical activity in healthy  
596 adults: Relationship to age and cognitive performance. *Neurobiol. Aging*, *136*, 44–57.
- 597 Pusil, S., Dimitriadis, S. I., López, M. E., Pereda, E., & Maestú, F. (2019). Aberrant MEG multi-frequency  
598 phase temporal synchronization predicts conversion from mild cognitive impairment-to-alzheimer's  
599 disease. *Neuroimage Clin*, *24*, 101972.
- 600 Pusil, S., López, M. E., Cuesta, P., Bruña, R., Pereda, E., & Maestú, F. (2019). Hypersynchronization  
601 in mild cognitive impairment: The 'x' model. *Brain*, *142*(12), 3936–3950.
- 602 Quinn, A. J., van Ede, F., Brookes, M. J., Heideman, S. G., Nowak, M., Seedat, Z. A., Vidaurre,  
603 D., Zich, C., Nobre, A. C., & Woolrich, M. W. (2019). Unpacking transient event dynamics in  
604 electrophysiological power spectra. *Brain Topogr.*, *32*(6), 1020–1034.
- 605 Samaha, J., Gosseries, O., & Postle, B. R. (2017). Distinct oscillatory frequencies underlie excitability of  
606 human occipital and parietal cortex. *J. Neurosci.*, *37*(11), 2824–2833.

- 607 Samson-Dollfus, D., Delapierre, G., Do Marcolino, C., & Blondeau, C. (1997). Normal and pathological  
608 changes in alpha rhythms. *Int. J. Psychophysiol.*, *26*(1-3), 395–409.
- 609 Schaefer, A., Kong, R., Gordon, E. M., Laumann, T. O., Zuo, X.-N., Holmes, A. J., Eickhoff, S. B.,  
610 & Yeo, B. T. T. (2018). Local-Global parcellation of the human cerebral cortex from intrinsic  
611 functional connectivity MRI. *Cereb. Cortex*, *28*(9), 3095–3114.
- 612 Schmidt, R., Herrojo Ruiz, M., Kilavik, B. E., Lundqvist, M., Starr, P. A., & Aron, A. R. (2019). Beta  
613 oscillations in working memory, executive control of movement and thought, and sensorimotor  
614 function. *J. Neurosci.*, *39*(42), 8231–8238.
- 615 Sherman, M. A., Lee, S., Law, R., Haegens, S., Thorn, C. A., Hämäläinen, M. S., Moore, C. I., & Jones,  
616 S. R. (2016). Neural mechanisms of transient neocortical beta rhythms: Converging evidence from  
617 humans, computational modeling, monkeys, and mice. *Proc. Natl. Acad. Sci. U. S. A.*, *113*(33),  
618 E4885–94.
- 619 Sherman, S. M. (2001). Tonic and burst firing: Dual modes of thalamocortical relay. *Trends Neurosci.*,  
620 *24*(2), 122–126.
- 621 Shin, H., Law, R., Tsutsui, S., Moore, C. I., & Jones, S. R. (2017). The rate of transient beta frequency  
622 events predicts behavior across tasks and species. *Elife*, *6*.
- 623 Spitzer, B., & Haegens, S. (2017). Beyond the status quo: A role for beta oscillations in endogenous  
624 content (Re)Activation. *eNeuro*, *4*(4).
- 625 Stefanovski, L., Triebkorn, P., Spiegler, A., Diaz-Cortes, M.-A., Solodkin, A., Jirsa, V., McIntosh, A. R.,  
626 Ritter, P., & Alzheimer's Disease Neuroimaging Initiative. (2019). Linking molecular pathways  
627 and Large-Scale computational modeling to assess candidate disease mechanisms and pharmaco-  
628 dynamics in alzheimer's disease. *Front. Comput. Neurosci.*, *13*, 54.
- 629 Stoiljkovic, M., Kelley, C., Horvath, T. L., & Hajós, M. (2018). Neurophysiological signals as predic-  
630 tive translational biomarkers for alzheimer's disease treatment: Effects of donepezil on neuronal  
631 network oscillations in TgF344-AD rats. *Alzheimers. Res. Ther.*, *10*(1), 105.
- 632 Szul, M. J., Papadopoulos, S., Alavizadeh, S., Daligaut, S., Schwartz, D., Mattout, J., & Bonaiuto, J. J.  
633 (2023). Diverse beta burst waveform motifs characterize movement-related cortical dynamics.  
634 *Prog. Neurobiol.*, *228*, 102490.
- 635 Tadel, F., Baillet, S., Mosher, J. C., Pantazis, D., & Leahy, R. M. (2011). Brainstorm: A user-friendly  
636 application for MEG/EEG analysis. *Comput. Intell. Neurosci.*, *2011*, 879716.
- 637 Taulu, S., & Hari, R. (2009). Removal of magnetoencephalographic artifacts with temporal signal-space  
638 separation: Demonstration with single-trial auditory-evoked responses. *Hum. Brain Mapp.*, *30*(5),  
639 1524–1534.
- 640 Tröndle, M., Popov, T., Pedroni, A., Pfeiffer, C., Barańczuk-Turska, Z., & Langer, N. (2023). Decom-  
641 posing age effects in EEG alpha power. *Cortex*, *161*, 116–144.



## REFERENCES

33

- 642 van Ede, F., Quinn, A. J., Woolrich, M. W., & Nobre, A. C. (2018). Neural oscillations: Sustained  
643 rhythms or transient Burst-Events? *Trends Neurosci.*, *41*(7), 415–417.
- 644 Wechsler, D. (1955). Wechsler adult intelligence scale—. *Archives of Clinical Neuropsychology*.
- 645 Welch, P. (1967). The use of fast fourier transform for the estimation of power spectra: A method based  
646 on time averaging over short, modified periodograms. *IEEE Trans. Audio Electroacoust.*, *15*(2),  
647 70–73.
- 648 Wessel, J. R. (2020).  $\beta$ -Bursts reveal the Trial-to-Trial dynamics of movement initiation and cancellation.  
649 *J. Neurosci.*, *40*(2), 411–423.
- 650 Wiesman, A. I., Murman, D. L., Losh, R. A., Schantell, M., Christopher-Hayes, N. J., Johnson, H. J.,  
651 Willett, M. P., Wolfson, S. L., Losh, K. L., Johnson, C. M., et al. (2022). Spatially resolved  
652 neural slowing predicts impairment and amyloid burden in alzheimer’s disease. *Brain*, *145*(6),  
653 2177–2189.
- 654 Yu, Y., Sanabria, D. E., Wang, J., Hendrix, C. M., Zhang, J., Nebeck, S. D., Amundson, A. M., Busby,  
655 Z. B., Bauer, D. L., Johnson, M. D., Johnson, L. A., & Vitek, J. L. (2021). Parkinsonism alters  
656 beta burst dynamics across the basal Ganglia–Motor cortical network. *J. Neurosci.*, *41*(10), 2274–  
657 2286.
- 658 Zimmermann, J., Perry, A., Breakspear, M., Schirner, M., Sachdev, P., Wen, W., Kochan, N. A., Map-  
659 stone, M., Ritter, P., McIntosh, A. R., & Solodkin, A. (2018). Differentiation of alzheimer’s  
660 disease based on local and global parameters in personalized virtual brain models. *Neuroimage*  
661 *Clin*, *19*, 240–251.
- 662 Zott, B., Simon, M. M., Hong, W., Unger, F., Chen-Engerer, H.-J., Frosch, M. P., Sakmann, B., Walsh,  
663 D. M., & Konnerth, A. (2019). A vicious cycle of  $\beta$  amyloid–dependent neuronal hyperactivation.  
664 *Science*, *365*(6453), 559–565.

## 665 **Data and Code Availability**

666 Code to perform analyses is available at: <https://github.com/jonescompneurolab/SpectralEvents>

667 Data will be made available on request.

## 668 **Author Contributions**

669 DSB, GL, RB – methodology, software, analysis, visualization, original draft

670 DZ, JC, BC, EP, ME, RB, FM, SJ – conceptualization, methodology, review and editing.

## 671 **Funding**

672 This work was supported by funds from NIH and the Collaborative Research in Computational Neu-  
673 roscience (CRCNS) under the project " *Interpreting MEG Biomarkers of Alzheimer's Progression with*  
674 *Human Neocortical Neurosolver*". UCM-Santander grants for PhD students, provided additional eco-  
675 nomical support to main author.

## 676 **Declaration of Competing Interests**

677 The authors declare no competing financial interests
